# Supplementary material for: Incidence, Prevalence, and Survival Outcomes of Patients with Myeloproliferative Neoplasms in the United States: a SEER database analysis, years 2000–2021
Source: Research Square preprint supplement (doi:10.21203/rs.3.rs-9510524/v1), 2026-05-06

# Incidence, Prevalence, and Survival Outcomes of Patients with Myeloproliferative Neoplasms in the United States: a SEER database analysis, years 2001-2021

## Contents

Table S1: ICD-O-3 codes used to identify AML and MDS patients

Table S2: Conversion Factor Formula for Calculation of Total Estimated US Prevalence

Table S3: Socio-Economic Distribution of Patients Living with Myeloproliferative Neoplasms (MPNs) in the United States between the years 2000 – 2021

Table S4: Incidence Rates stratified by Gender and Age for Patients Living with Myeloproliferative Neoplasms (MPNs) in the United States between years 2000 – 2021

Table S5: Prevalence of Patients Living with MPNs by MPN subtype and age group in the United States between 1975-2021 Utilizing the SEER 8 Database

Table S6: Number of cases (n) of Myeloproliferative Neoplasms diagnosed in SEER-17 according to method of diagnosis and calendar period, 2000-2021

Figure S1: Racial Distribution of Patients Living with Myeloproliferative Neoplasms in United States between 2000-2021

Figure S2: Incidence Rate Ratio (Female: Male) for Patients Living with Myeloproliferative Neoplasms in the United States between 2000-2021

Figure S3: 5-year prevalence trends for Patients Living with Myeloproliferative Neoplasms in United States between years 2000-2021

Figure S4: Population pyramids depicting estimated prevalence on Jan 1, 2021, using SEER 8 registries

Figure S5: Population Pyramids depicting age and gender distribution along with Prevalence of Myeloid Neoplasms utilizing SEER 17 Database in the United States, with patients alive on Jan 1, 2021

Figure S6: Overall survival of Patients with Living with Myeloproliferative Neoplasms in the United States between 2000-2021 stratified by Age

Figure S7: Overall survival of Patients with Living with Myeloproliferative Neoplasms in the United States between 2000-2021 stratified by Race/Ethnicity

Figure S8: Overall survival of Patients with Living with Myeloproliferative Neoplasms in the United States between 2000-2021 stratified by Sex and Race/Ethnicity

Figure S9: Age adjusted Overall Survival curves for patients living with Myeloproliferative Neoplasms in the United States between 2000-2021

Figure S10: Overall Survival curves for patients living with Myeloproliferative Neoplasms in the United States between 2000-2021 stratified by Year of Diagnosis

Figure S11: Distribution of MPNs by Method of Diagnosis

SEER 17 includes registries in eight states (Connecticut, Hawaii, Iowa, Kentucky, Louisiana, New Jersey, New Mexico, and Utah), six metropolitan areas (Atlanta, Georgia, Los Angeles, San Francisco-Oakland, San Jose-Monterey, Seattle-Puget Sound) and the areas of Greater California, Rural Georgia, Greater Georgia; and finally, the Alaska Native Tumor Registry

## Figures and Tables:

**Table S1: ICD-O-3 codes used to identify AML and MDS patients**

| AML  | MDS  |
|------|------|
| 9840 | 9975 |
| 9861 | 9980 |
| 9865 | 9982 |
| 9866 | 9983 |
| 9867 | 9985 |
| 9869 | 9986 |
| 9871 | 9987 |
| 9872 | 9989 |
| 9873 | 9992 |
| 9874 |      |
| 9877 |      |
| 9878 |      |
| 9891 |      |
| 9895 |      |
| 9896 |      |
| 9897 |      |
| 9898 |      |
| 9910 |      |
| 9920 |      |

**Table S2: Conversion Factor Formula for Calculation of Total Estimated US Prevalence**

|                          |           |                                                                                   |
|--------------------------|-----------|-----------------------------------------------------------------------------------|
| <b>Conversion factor</b> | CFE_Total | Total US population aged $\geq 20$ / Total SEER population of aged $\geq 20$      |
|                          | CFE_Males | Total US male population of males aged $\geq 20$ / Total SEER population of males |

|                |             |                                                                                            |
|----------------|-------------|--------------------------------------------------------------------------------------------|
| <b>formula</b> |             | aged ≥ 20                                                                                  |
|                |             |                                                                                            |
|                | CFE_Females | Total US male population of females aged ≥ 20 / Total SEER population of females aged ≥ 20 |

We multiplied the CFE for corresponding sex, by each age-category prevalence counts in SEER 8 dataset, to estimate the population pyramid counts on Jan 1, 2021, and July 1, 2024.

**Table S3: Socio-Economic Distribution of Patients Living with Myeloproliferative Neoplasms (MPNs) in the United States between the years 2000 – 2021**

| Variable                                             | ET            | PV           | PMF          | CML         | overall      |
|------------------------------------------------------|---------------|--------------|--------------|-------------|--------------|
| Median household income                              |               |              |              |             |              |
| < \$50,000                                           | 1461 (6%)     | 1722(7.3%)   | 339 (5.54%)  | 758 (7.8%)  | 4280 (6.7%)  |
| \$50,000-75,000                                      | 8889 (39%)    | 8990 (41.3%) | 2353 (40.6%) | 3836(44%)   | 24068 (38%)  |
| \$75,000-100,000                                     | 9309(41%)     | 8525(39.2%)  | 2345(40.4%)  | 3534(40.5%) | 23713(37.5%) |
| > \$100k                                             | 4484(18.5%)   | 4197 (17.8%) | 1092(17.8%)  | 1351(14.2%) | 11124(17.5%) |
| not available                                        | 29 (0.11%)    | 22 (0.09%)   | 2 (0.03%)    | 4(0.04%)    | 57(0.08%)    |
| Sum                                                  | 22711 (100%)  | 21734 (100%) | 5792(100%)   | 8725 (100%) | 63242 (100%) |
| Geographic county area, population size              |               |              |              |             |              |
| Metropolitan >1mill                                  | 14453 (64.5%) | 13137(61%)   | 3548(63%)    | 5130(59.5%) | 36268(62.5%) |
| Metropolitan 250k – 1mill                            | 4737(21.2%)   | 4594(21.3%)  | 1284(22.8%)  | 2137(24.7%) | 12752(22%)   |
| Metropolitan <250k                                   | 1899(8.5%)    | 2005(9.3%)   | 503(8.9%)    | 844(9.6%)   | 5251(8.9%)   |
| Nonmetropolitan adjacent to a metropolitan area      | 1846 (8.2%)   | 2104 (9.8%)  | 465 (8.2%)   | 769 (8.8%)  | 5184(8.8%)   |
| Nonmetropolitan, not adjacent to a metropolitan area | 1182 (5.3%)   | 1583 (7.4%)  | 325 (5.8%)   | 589 (6.8%)  | 3679 (6.3%)  |
| Unknown                                              | 55 (0.24%)    | 34 (0.15%)   | 6 (0.1%)     | 14 (0.15%)  | 109 (0.18%)  |

|     |                 |                 |             |             |              |
|-----|-----------------|-----------------|-------------|-------------|--------------|
| Sum | 22397<br>(100%) | 21533<br>(100%) | 5633 (100%) | 8797 (100%) | 58360 (100%) |
|-----|-----------------|-----------------|-------------|-------------|--------------|

**Table S4: Incidence Rates (per 100,000 person-years) stratified by sex and age for patients diagnosed with myeloproliferative neoplasms (MPNs) in the United States between years 2000 – 2021.**

|         | Age (years) | ET    |      | PV    |      | PMF   |      | CML   |      |
|---------|-------------|-------|------|-------|------|-------|------|-------|------|
|         |             | Count | Rate | Count | Rate | Count | Rate | Count | Rate |
| Overall | 20-59       | 8284  | 0.76 | 8291  | 0.74 | 1342  | 0.12 | 5277  | 0.50 |
|         | ≥60         | 15888 | 4.67 | 15165 | 4.56 | 4789  | 1.44 | 4206  | 1.30 |
| Male    | 20-59       | 3178  | 0.58 | 5502  | 0.99 | 758   | 0.13 | 3045  | 0.58 |
|         | ≥60         | 6023  | 4.06 | 7836  | 5.40 | 2929  | 2.00 | 2322  | 1.60 |
| Female  | 20-59       | 5106  | 0.95 | 2789  | 0.49 | 584   | 0.10 | 2232  | 0.42 |
|         | ≥60         | 9865  | 5.20 | 7329  | 3.83 | 1860  | 1.01 | 1884  | 1.06 |

**Table S5: Prevalence estimates of patients by MPN subtype and age group in the United States between 1975-2021 Utilizing the SEER 8 Database.** Abbreviations: ET: Essential Thrombocythemia, PV: Polycythemia Vera, PMF: Primary Myelofibrosis, CML: Chronic Myeloid Leukemia, MPN: Myeloproliferative Neoplasms, yrs: years). Prevalence percentage defined as (Patients with MPN alive at Jan 1, 2021/total population) x 100

|                | %              | Number per 100,000 | Estimated prevalence count | Estimated whole US Prevalence Count (2021) | Estimated whole US prevalence Count (2024) |
|----------------|----------------|--------------------|----------------------------|--------------------------------------------|--------------------------------------------|
| <b>PV</b>      |                |                    |                            |                                            |                                            |
| <b>Overall</b> | <b>0.0212%</b> | <b>21</b>          | <b>4392</b>                | <b>52,955</b>                              | <b>54,682</b>                              |
| 20-39 years    | 0.0021%        | 2                  | 164                        | 1,973                                      | 2,037                                      |
| 40-59 years    | 0.0131%        | 13                 | 913                        | 11,011                                     | 11,370                                     |
| 60+ years      | 0.553%         | 55                 | 3,315                      | 39,973                                     | 41,276                                     |

|                |                |           |              |               |               |
|----------------|----------------|-----------|--------------|---------------|---------------|
| 20-29 years    | 0.0010%        | 1         | 39           | 470           | 486           |
| 30-39 years    | 0.0031%        | 3         | 125          | 1,502         | 1,551         |
| 40-49 years    | 0.0080%        | 8         | 281          | 3,383         | 3,494         |
| 50-59 years    | 0.0183%        | 18        | 633          | 7,626         | 7,875         |
| 60-69 years    | 0.0384%        | 38        | 1,186        | 14,305        | 14,771        |
| 70-79 years    | 0.0657%        | 66        | 1,255        | 15,132        | 15,626        |
| 80+ years      | 0.0874%        | 87        | 874          | 10,535        | 10,878        |
| <b>ET</b>      |                |           |              |               |               |
| <b>Overall</b> | <b>0.0250%</b> | <b>25</b> | <b>5,177</b> | <b>62,420</b> | <b>64,456</b> |
| 20-39 years    | 0.0046%        | 5         | 354          | 4,267         | 4,406         |
| 40-59 years    | 0.0181%        | 18        | 1,256        | 15,144        | 15,638        |
| 60+ years      | 0.0595%        | 59        | 3,567        | 43,009        | 44,412        |
| 20-29 years    | 0.0024%        | 2         | 90           | 1,082         | 1,117         |
| 30-39 years    | 0.0066%        | 7         | 264          | 3,186         | 3,289         |
| 40-49 years    | 0.0135%        | 14        | 473          | 5,703         | 5,889         |
| 50-59 years    | 0.0227%        | 23        | 783          | 9,441         | 9,749         |
| 60-69 years    | 0.0377%        | 38        | 1,164        | 14,030        | 14,488        |
| 70-79 years    | 0.0707%        | 71        | 1,350        | 16,278        | 16,808        |

|                |                |           |              |              |               |
|----------------|----------------|-----------|--------------|--------------|---------------|
| 80+ years      | 0.1054%        | 105       | 1,053        | 12,700       | 13,114        |
| <b>PMF</b>     |                |           |              |              |               |
| <b>Overall</b> | <b>0.0034%</b> | <b>3</b>  | <b>698</b>   | <b>8,421</b> | <b>8,696</b>  |
| 20-39 years    | 0.0002%        | 0/2       | 12           | 145          | 149           |
| 40-59 years    | 0.0019%        | 2         | 134          | 1,621        | 1,673         |
| 60+ years      | 0.0092%        | 9         | 552          | 6,656        | 6,873         |
| 20-29 years    | 0.0000%        | 0.0       | 1            | 12           | 12            |
| 30-39 years    | 0.0003%        | 0.3       | 11           | 133          | 137           |
| 40-49 years    | 0.0008%        | 1         | 29           | 347          | 359           |
| 50-59 years    | 0.0031%        | 3         | 106          | 1,273        | 1,315         |
| 60-69 years    | 0.0060%        | 6         | 186          | 2,245        | 2,318         |
| 70-79 years    | 0.0133%        | 13        | 255          | 3,072        | 3,172         |
| 80+ years      | 0.0111%        | 11        | 111          | 1,338        | 1,382         |
| <b>CML</b>     |                |           |              |              |               |
| <b>Overall</b> | <b>0.0115%</b> | <b>12</b> | <b>2,390</b> | <b>28822</b> | <b>29,762</b> |
| 20-39 years    | 0.0048%        | 5         | 372          | 4,487        | 4,633         |
| 40-59 years    | 0.0121%        | 12        | 844          | 10,175       | 10,507        |
| 60+ years      | 0.0196%        | 20        | 1,175        | 14,161       | 14,623        |
| 20-29 years    | 0.0032%        | 3         | 120          | 1,446        | 1,493         |
| 30-39 years    | 0.0063%        | 6         | 252          | 3,041        | 3,140         |
| 40-49 years    | 0.0101%        | 10        | 352          | 4,242        | 4,380         |
| 50-59 years    | 0.0143%        | 14        | 492          | 5,933        | 6,127         |

|             |         |    |     |       |       |
|-------------|---------|----|-----|-------|-------|
| 60-69 years | 0.0176% | 18 | 544 | 6,562 | 6,776 |
| 70-79 years | 0.0226% | 23 | 433 | 5,216 | 5,386 |
| 80+ years   | 0.0198% | 20 | 198 | 2,384 | 2,461 |

|                | %              | Number per 100,000 | Estimated prevalence count | Estimated whole US Prevalence Count (2021) | Estimated whole US prevalence Count (2024) |
|----------------|----------------|--------------------|----------------------------|--------------------------------------------|--------------------------------------------|
| <b>PV</b>      |                |                    |                            |                                            |                                            |
| <b>Overall</b> | <b>0.0212%</b> | <b>21</b>          | <b>4392</b>                | <b>52,955</b>                              | <b>54,682</b>                              |
| 20-39 years    | 0.0021%        | 2                  | 164                        | 1,973                                      | 2,037                                      |
| 40-59 years    | 0.0131%        | 13                 | 913                        | 11,011                                     | 11,370                                     |
| 60+ years      | 0.553%         | 55                 | 3,315                      | 39,973                                     | 41,276                                     |
| 20-29          | 0.0010%        | 1                  | 39                         | 470                                        | 486                                        |
| 30-39          | 0.0031%        | 3                  | 125                        | 1,502                                      | 1,551                                      |
| 40-49          | 0.0080%        | 8                  | 281                        | 3,383                                      | 3,494                                      |
| 50-59          | 0.0183%        | 18                 | 633                        | 7,626                                      | 7,875                                      |
| 60-69          | 0.0384%        | 38                 | 1,186                      | 14,305                                     | 14,771                                     |

|                |                |           |              |               |               |
|----------------|----------------|-----------|--------------|---------------|---------------|
|                |                |           |              |               |               |
| 70-79          | 0.0657%        | 66        | 1,255        | 15,132        | 15,626        |
| 80+            | 0.0874%        | 87        | 874          | 10,535        | 10,878        |
| <b>ET</b>      |                |           |              |               |               |
| <b>Overall</b> | <b>0.0250%</b> | <b>25</b> | <b>5,177</b> | <b>62,420</b> | <b>64,456</b> |
| 20-39 years    | 0.0046%        | 5         | 354          | 4,267         | 4,406         |
| 40-59 years    | 0.0181%        | 18        | 1,256        | 15,144        | 15,638        |
| 60+ years      | 0.0595%        | 59        | 3,567        | 43,009        | 44,412        |
| 20-29          | 0.0024%        | 2         | 90           | 1,082         | 1,117         |
| 30-39          | 0.0066%        | 7         | 264          | 3,186         | 3,289         |
| 40-49          | 0.0135%        | 14        | 473          | 5,703         | 5,889         |
| 50-59          | 0.0227%        | 23        | 783          | 9,441         | 9,749         |
| 60-69          | 0.0377%        | 38        | 1,164        | 14,030        | 14,488        |
| 70-79          | 0.0707%        | 71        | 1,350        | 16,278        | 16,808        |
| 80+            | 0.1054%        | 105       | 1,053        | 12,700        | 13,114        |
| <b>PMF</b>     |                |           |              |               |               |
| <b>Overall</b> | <b>0.0034%</b> | <b>3</b>  | <b>698</b>   | <b>8,421</b>  | <b>8,696</b>  |
| 20-39 years    | 0.0002%        | 0/2       | 12           | 145           | 149           |
| 40-59 years    | 0.0019%        | 2         | 134          | 1,621         | 1,673         |
| 60+ years      | 0.0092%        | 9         | 552          | 6,656         | 6,873         |
| 20-29          | 0.0000%        | 0.0       | 1            | 12            | 12            |
| 30-39          | 0.0003%        | 0.3       | 11           | 133           | 137           |

|                |                |           |              |              |               |
|----------------|----------------|-----------|--------------|--------------|---------------|
| 40-49          | 0.0008%        | 1         | 29           | 347          | 359           |
| 50-59          | 0.0031%        | 3         | 106          | 1,273        | 1,315         |
| 60-69          | 0.0060%        | 6         | 186          | 2,245        | 2,318         |
| 70-79          | 0.0133%        | 13        | 255          | 3,072        | 3,172         |
| 80+            | 0.0111%        | 11        | 111          | 1,338        | 1,382         |
| <b>CML</b>     |                |           |              |              |               |
| <b>Overall</b> | <b>0.0115%</b> | <b>12</b> | <b>2,390</b> | <b>28822</b> | <b>29,762</b> |
| 20-39 years    | 0.0048%        | 5         | 372          | 4,487        | 4,633         |
| 40-59 years    | 0.0121%        | 12        | 844          | 10,175       | 10,507        |
| 60+ years      | 0.0196%        | 20        | 1,175        | 14,161       | 14,623        |
| 20-29          | 0.0032%        | 3         | 120          | 1,446        | 1,493         |
| 30-39          | 0.0063%        | 6         | 252          | 3,041        | 3,140         |
| 40-49          | 0.0101%        | 10        | 352          | 4,242        | 4,380         |
| 50-59          | 0.0143%        | 14        | 492          | 5,933        | 6,127         |
| 60-69          | 0.0176%        | 18        | 544          | 6,562        | 6,776         |
| 70-79          | 0.0226%        | 23        | 433          | 5,216        | 5,386         |
| 80+            | 0.0198%        | 20        | 198          | 2,384        | 2,461         |

**Table S6: Number of cases (n) of Myeloproliferative Neoplasms diagnosed in SEER-17 according to method of diagnosis and calendar period, 2000-2021\***

|                 | <b>PV</b> | <b>ET</b> | <b>PMF</b> | <b>CML</b> |
|-----------------|-----------|-----------|------------|------------|
| <b>Clinical</b> |           |           |            |            |

|                      |      |      |      |      |
|----------------------|------|------|------|------|
| 2001-2005            | 479  | 263  | 13   | 1    |
| 2006-2010            | 653  | 695  | 29   | 11   |
| 2011-2015            | 1134 | 1162 | 56   | 25   |
| 2016-2021            | 1126 | 1336 | 41   | 46   |
| <b>Lab testing</b>   |      |      |      |      |
| 2001-2005            | 847  | 279  | 10   | 12   |
| 2006-2010            | 1078 | 821  | 20   | 39   |
| 2011-2015            | 1370 | 1067 | 24   | 96   |
| 2016-2021            | 1611 | 1819 | 20   | 149  |
| <b>Microscopic</b>   |      |      |      |      |
| 2001-2005            | 2846 | 2631 | 966  | 783  |
| 2006-2010            | 2747 | 3259 | 1221 | 1270 |
| 2011-2015            | 2990 | 3686 | 1563 | 2861 |
| 2016-2021            | 4192 | 5916 | 2065 | 4094 |
| <b>Not Specified</b> |      |      |      |      |
| 2001-2005            | 547  | 176  | 21   | 13   |
| 2006-2010            | 568  | 307  | 29   | 19   |
| 2011-2015            | 603  | 356  | 24   | 24   |
| 2016-2021            | 655  | 393  | 26   | 21   |

\*Method of diagnosis categories include microscopically confirmed [Microscopic] (positive histology, positive cytology, positive histology and positive immunophenotyping and/or positive genetic studies, positive microscopic confirmation with method unspecified); [Lab test] laboratory test/marker study; [Clinical] clinical diagnosis only (direct visualization without microscopic confirmation, radiography without microscopic confirmation, clinical diagnosis only); and [Not specified] other method of diagnosis/unknown

**Figure S1** - Racial distribution of patients living with myeloid neoplasms in the United States between years 2001-2021 (a) ET: Essential Thrombocythemia, (b) PV: Polycythemia Vera (c) PMF: Primary Myelofibrosis, and (d) CML: Chronic Myeloid Leukemia, BCR:ABL positive(CML: Chronic myeloid leukemia BCR:ABL positive, ET: essential thrombocythemia, PMF: primary myelofibrosis, PV: polycythemia vera, NHW: Non-Hispanic White, NHB: Non Hispanic Black, AI/AN: American Indian/ Alaska Native, AAPI: Asian And Pacific Islanders)

1a

## Essential Thrombocythemia

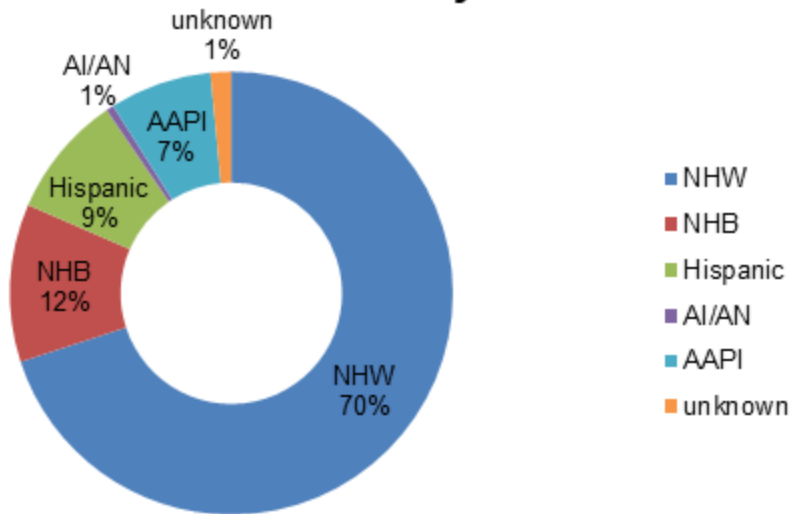

1b

## Polycythemia Vera

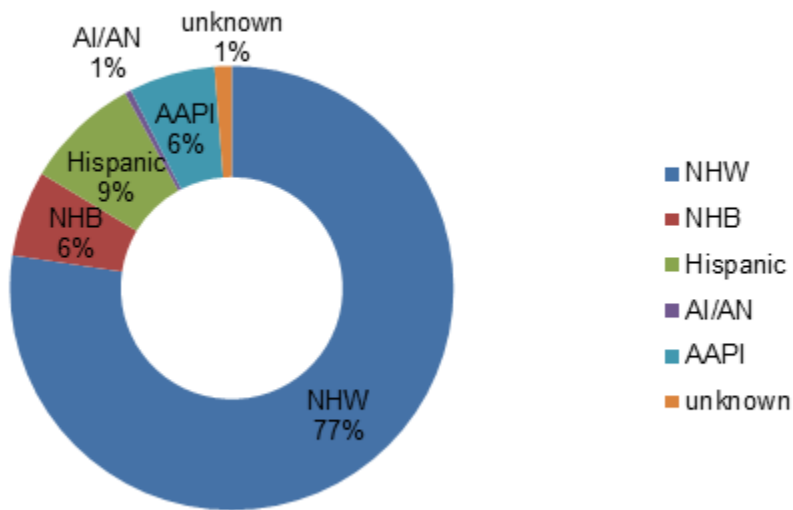

1c

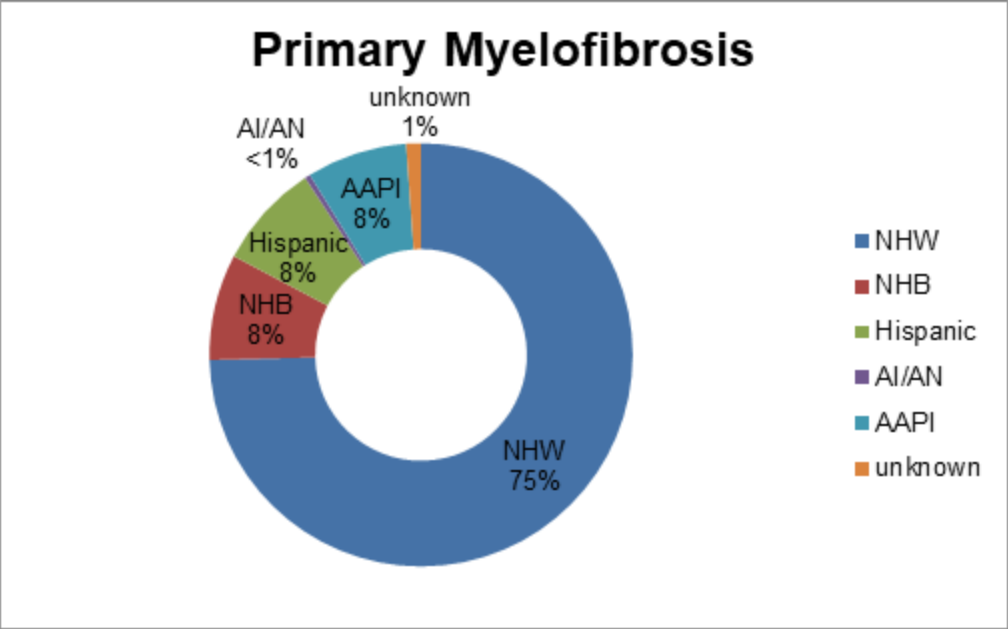

1d

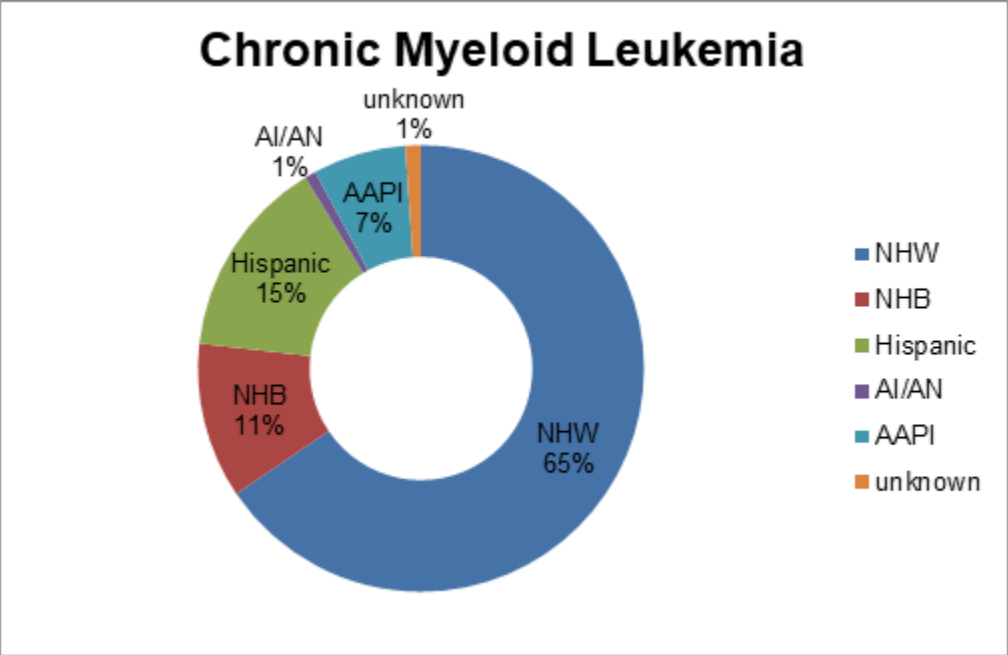

Figure S2: Incidence Rate Ratio (female:male) trend for patients with myeloproliferative neoplasms across different age groups

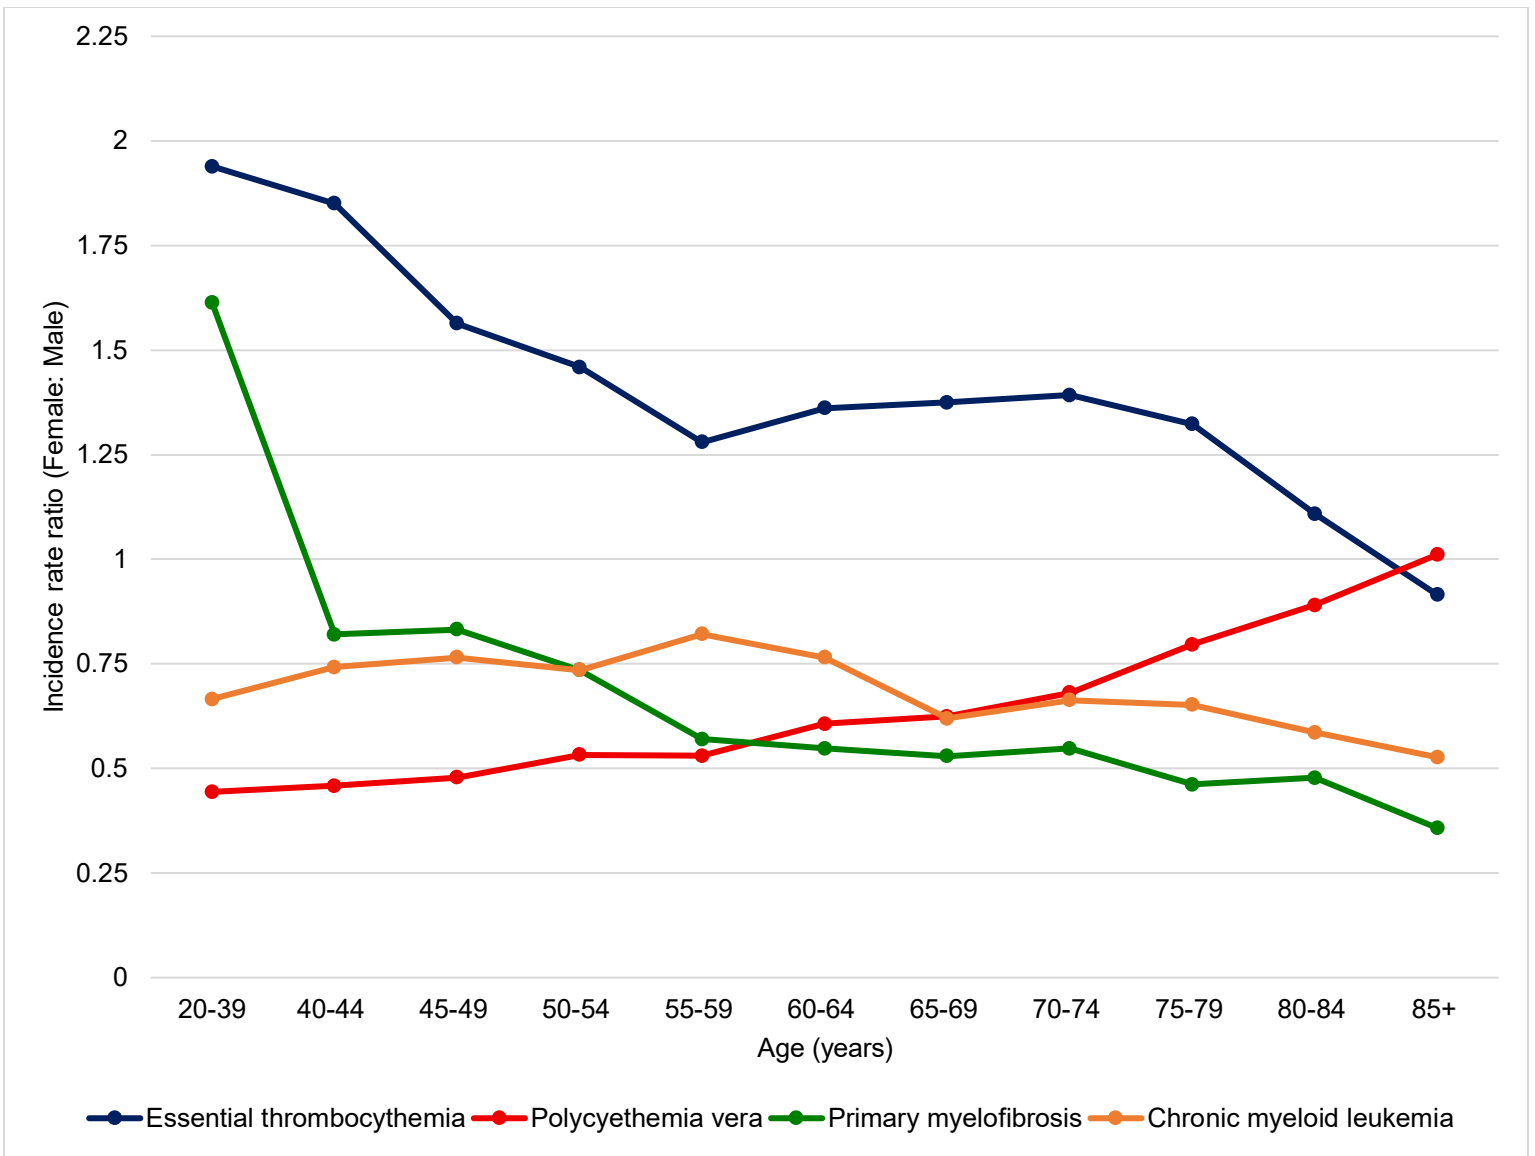

**Figure S3: 5-year counts trends of Patients Living with Myeloproliferative Neoplasms in United States between years 2000-2021**

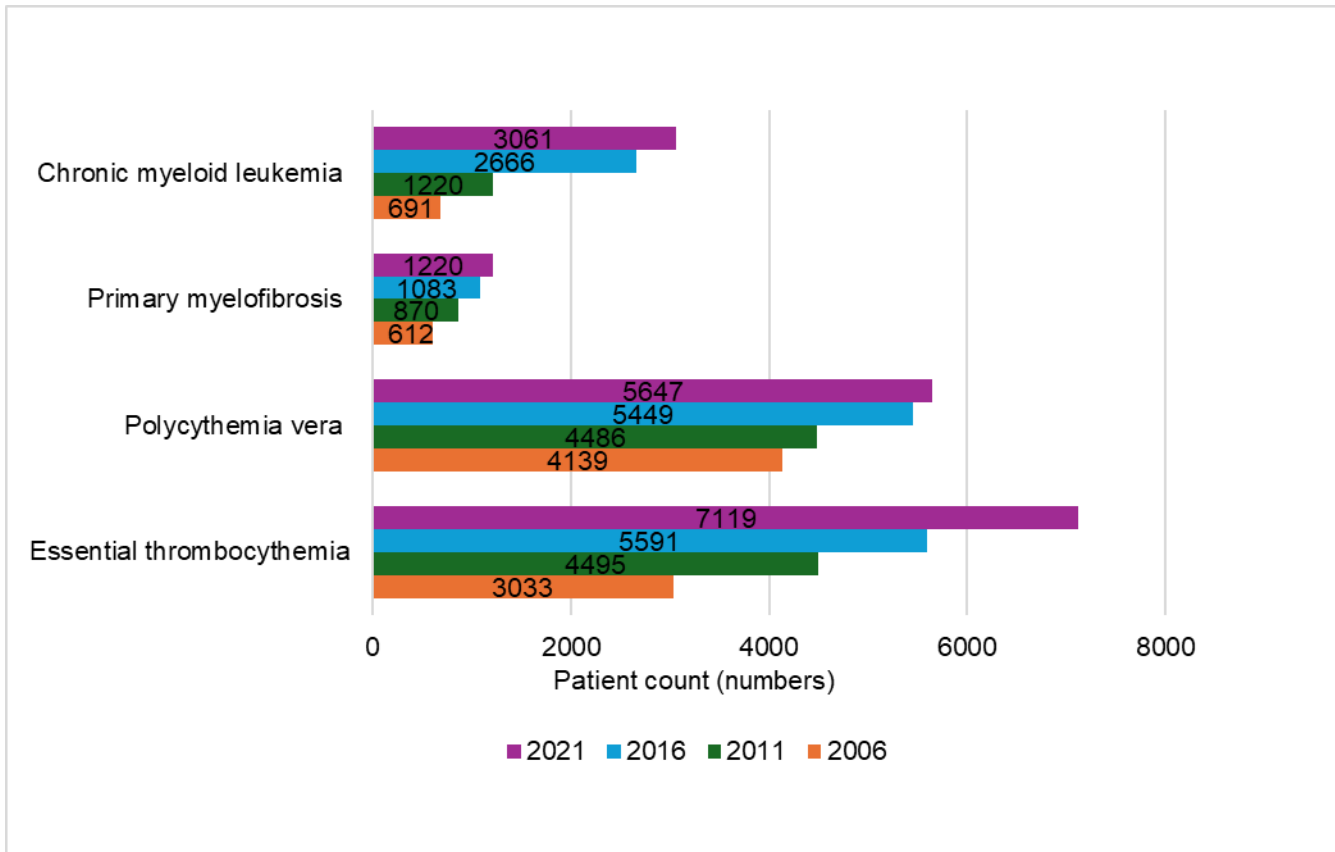

**Figure S4:** Population pyramids depicting estimated prevalence on Jan 1, 2021 using SEER 8 registries. (a) ET: essential thrombocythemia, (b) PV: polycythemia vera (c) PMF: primary myelofibrosis, and (d) CML: chronic myeloid leukemia

4a

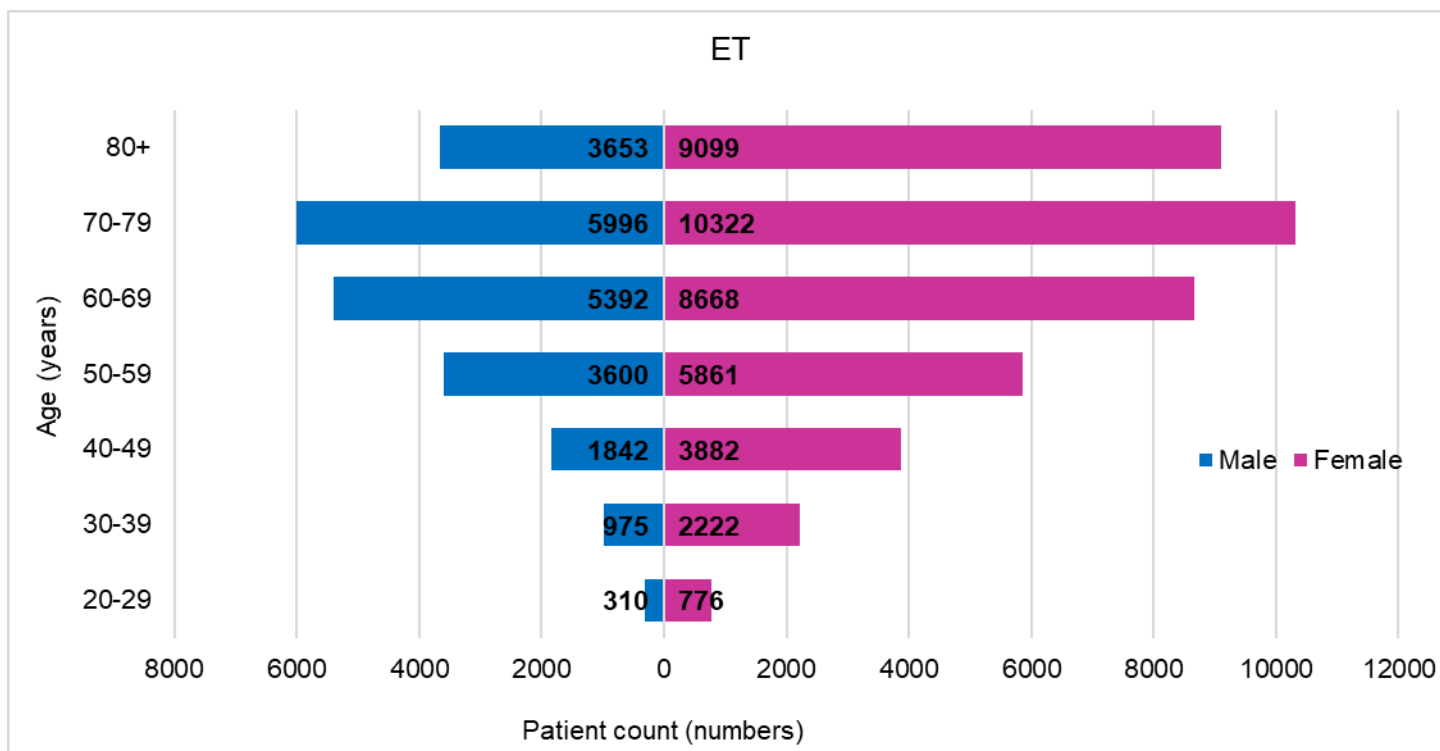

4b

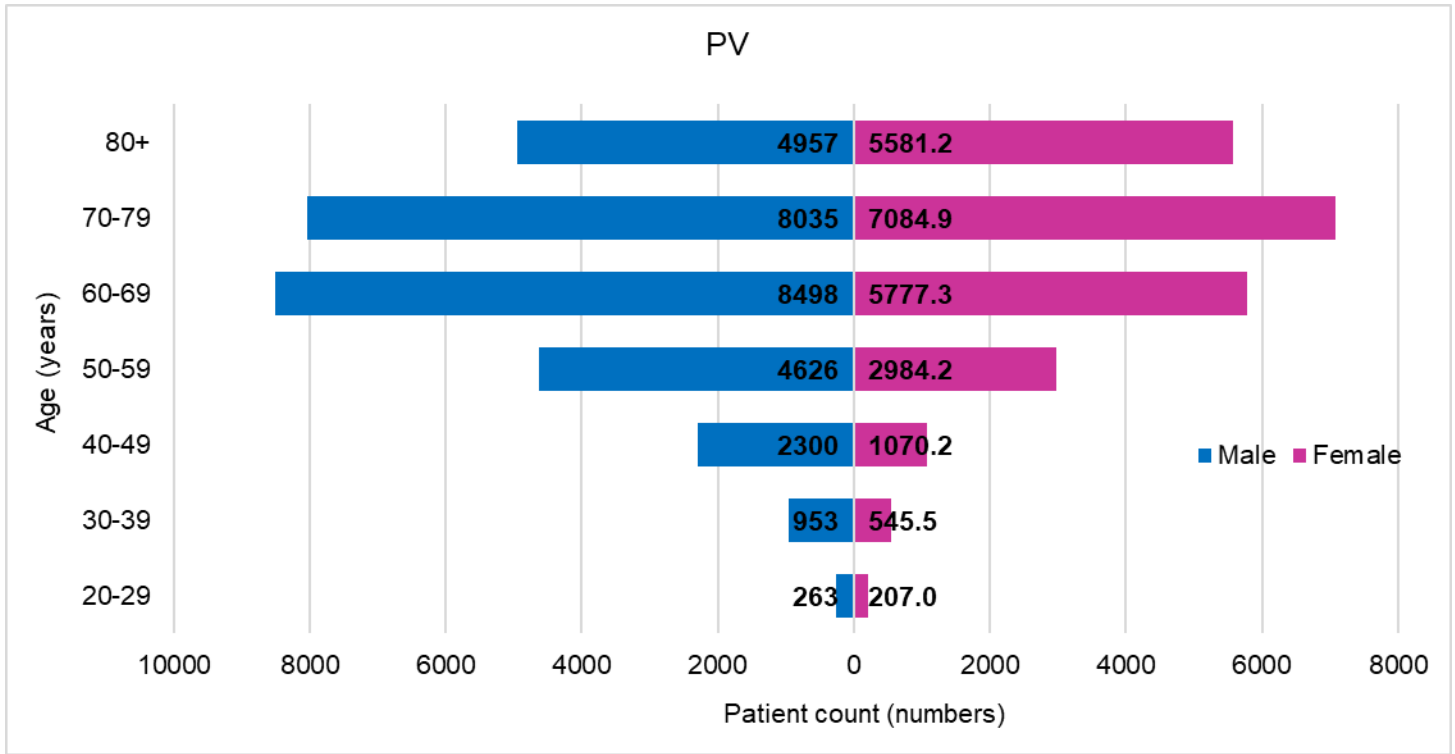

4c

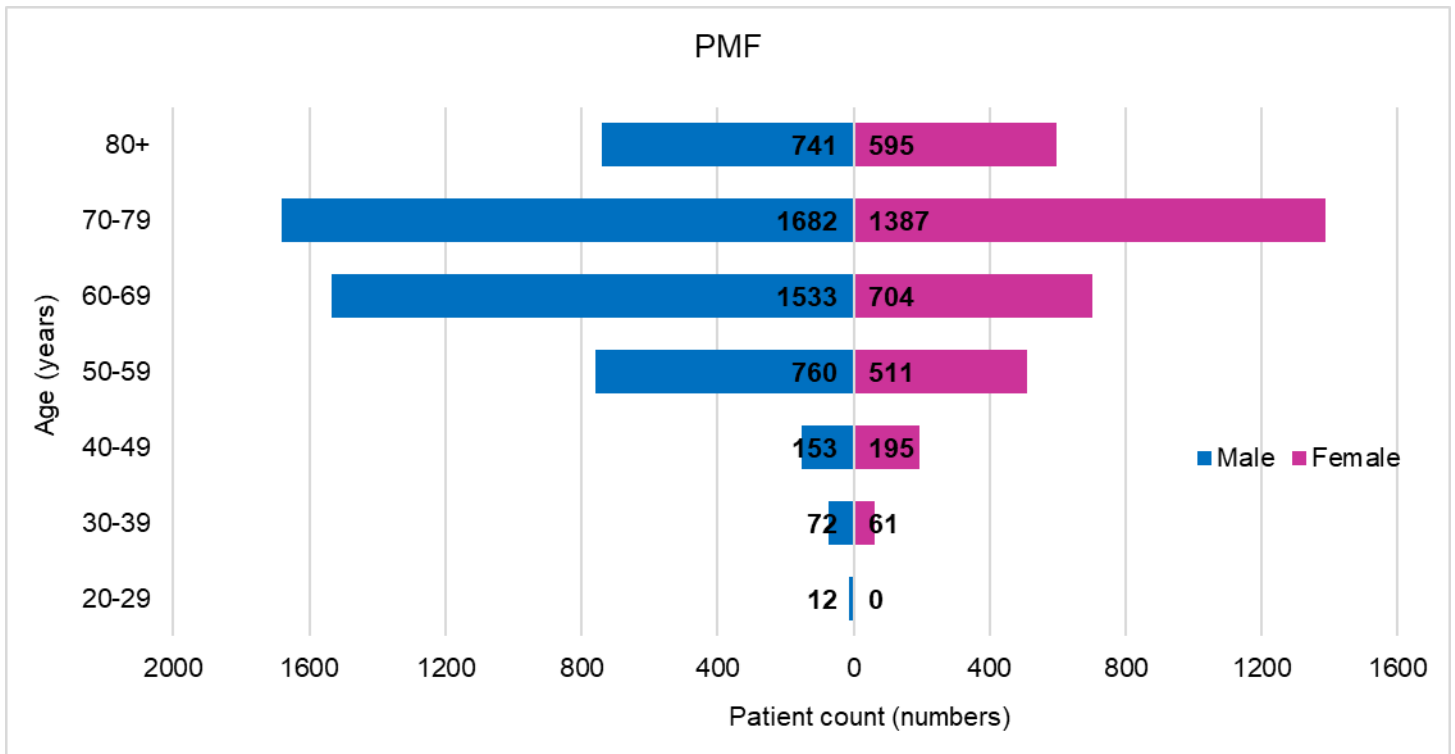

4d

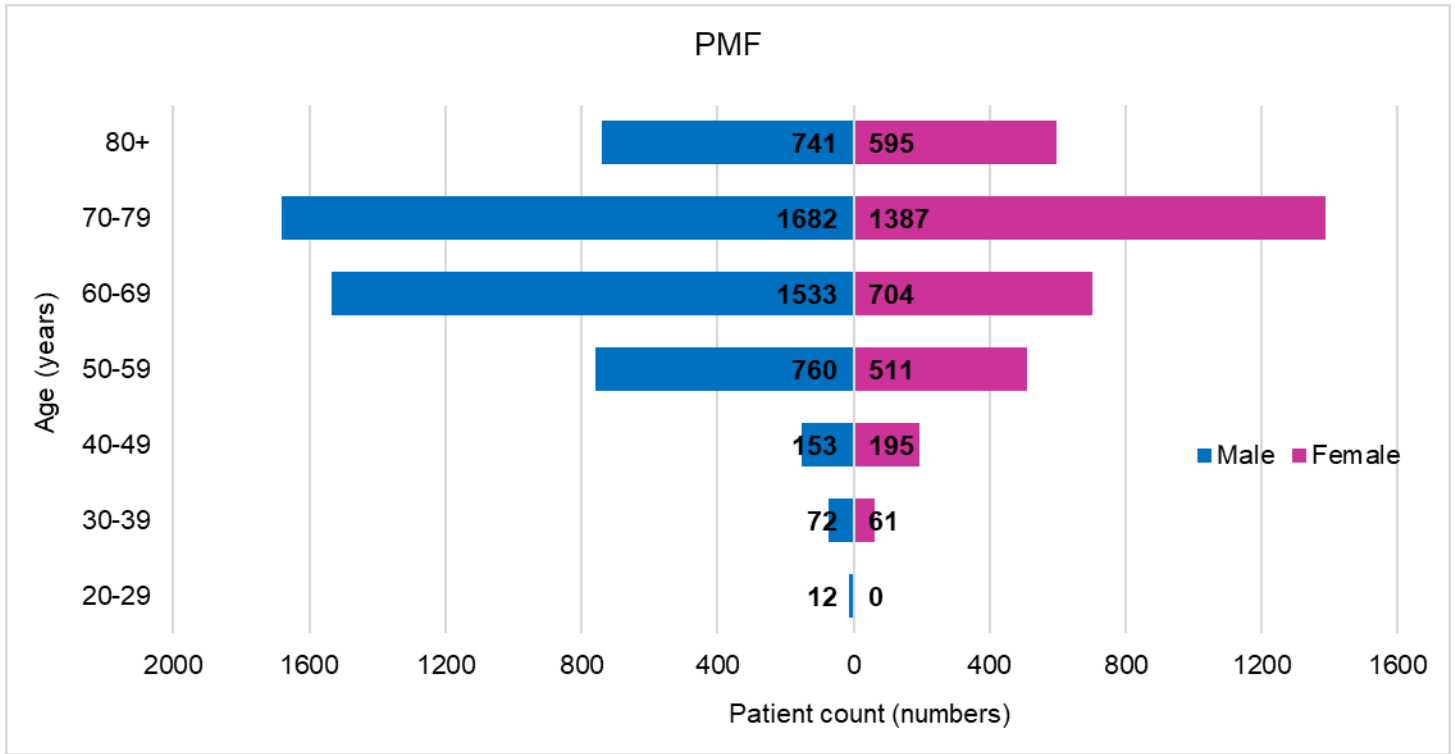

**Figure S5: Population Pyramids depicting prevalence on Jan 1, 2021 using SEER 17 registries. These prevalence numbers do not estimate the prevalence for the total US population. (a) ET: essential thrombocythemia, (b) PV: polycythemia vera (c) PMF: primary myelofibrosis, and (d) CML: chronic myeloid leukemia**

**5a**

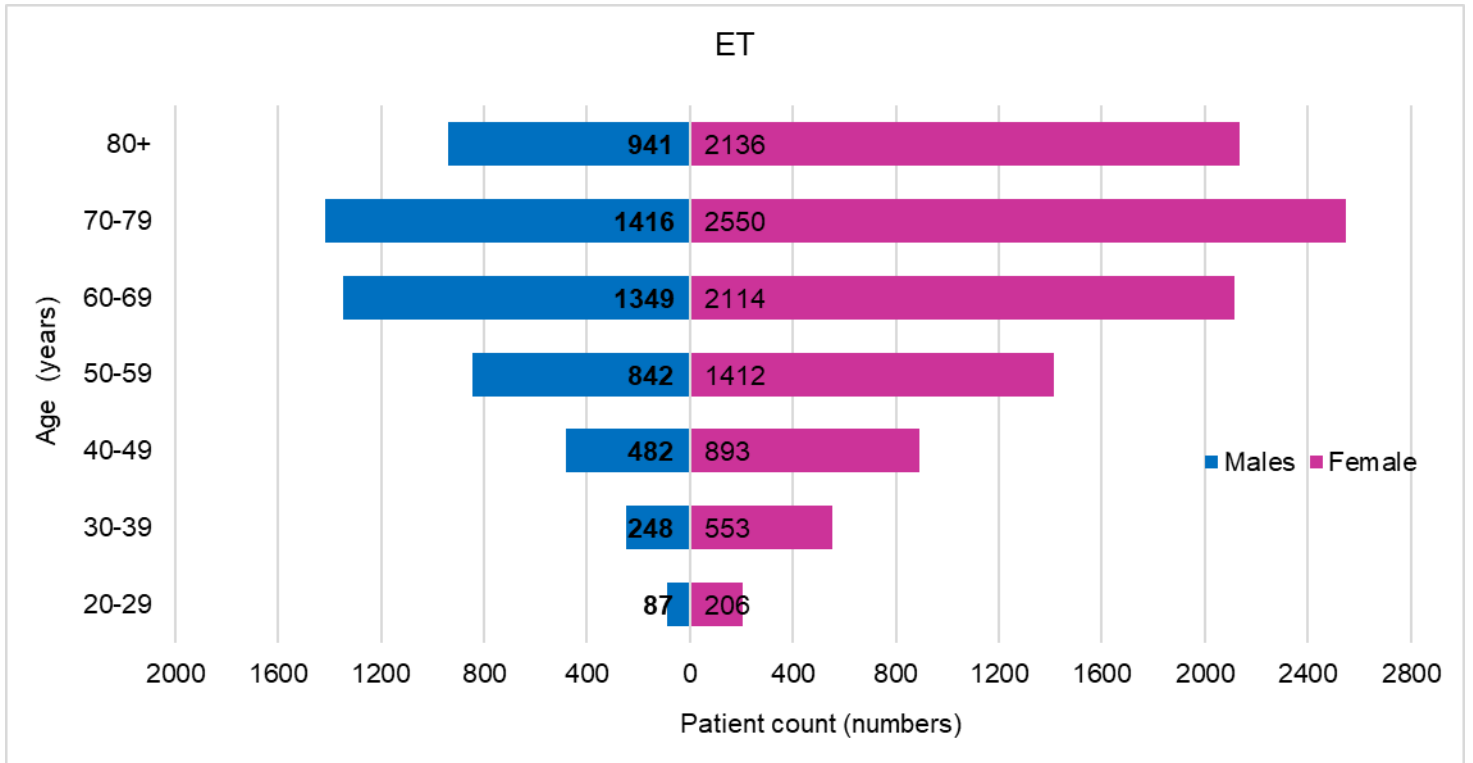

5b

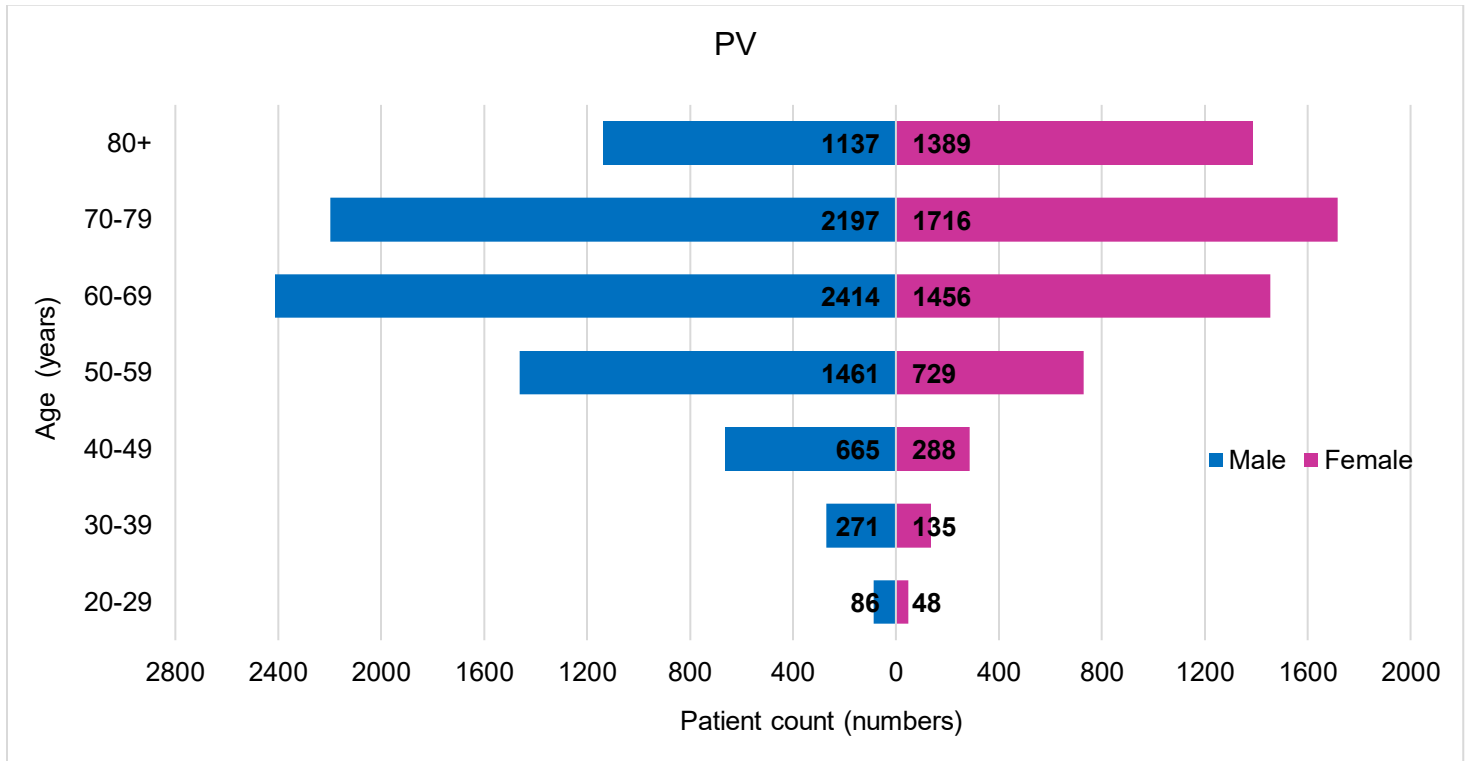

5c

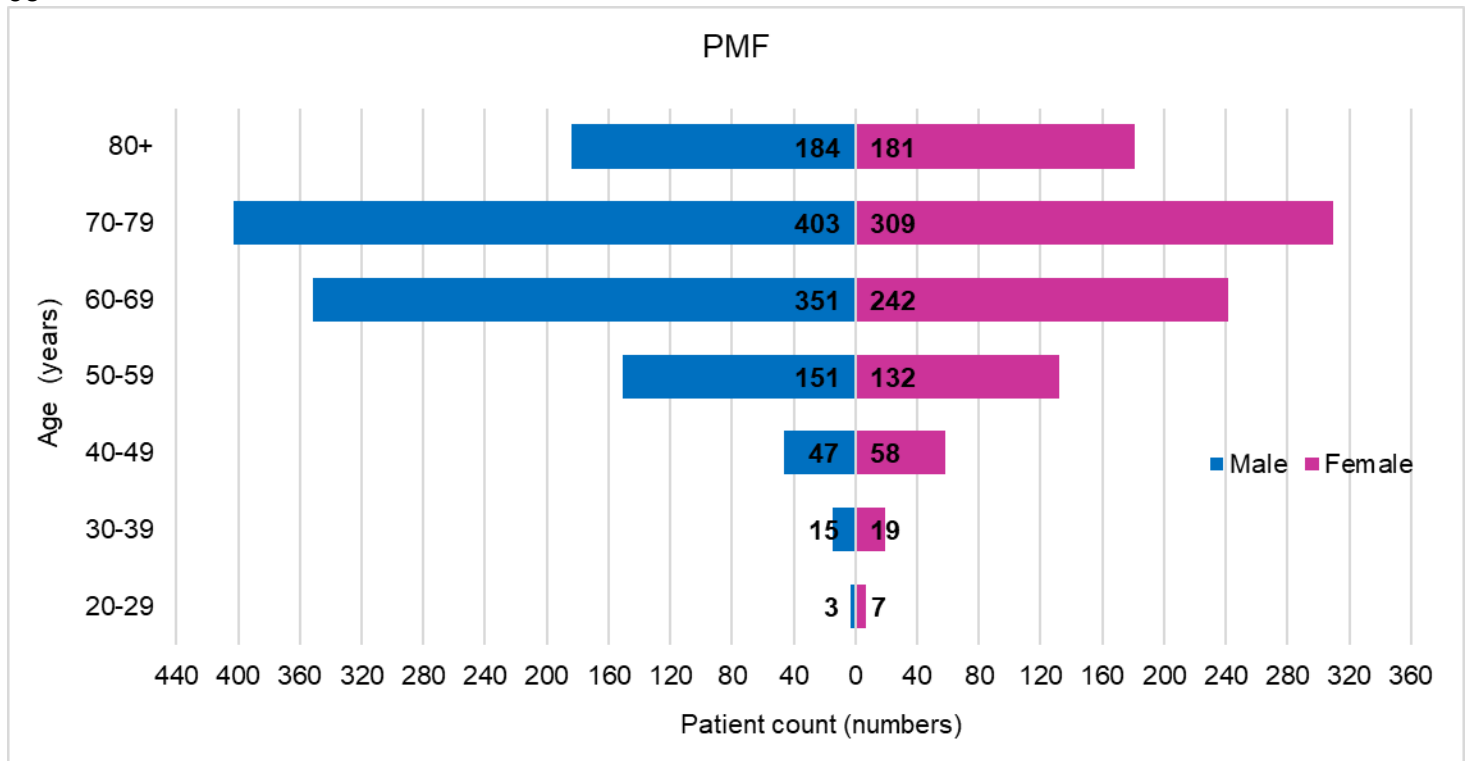

5d

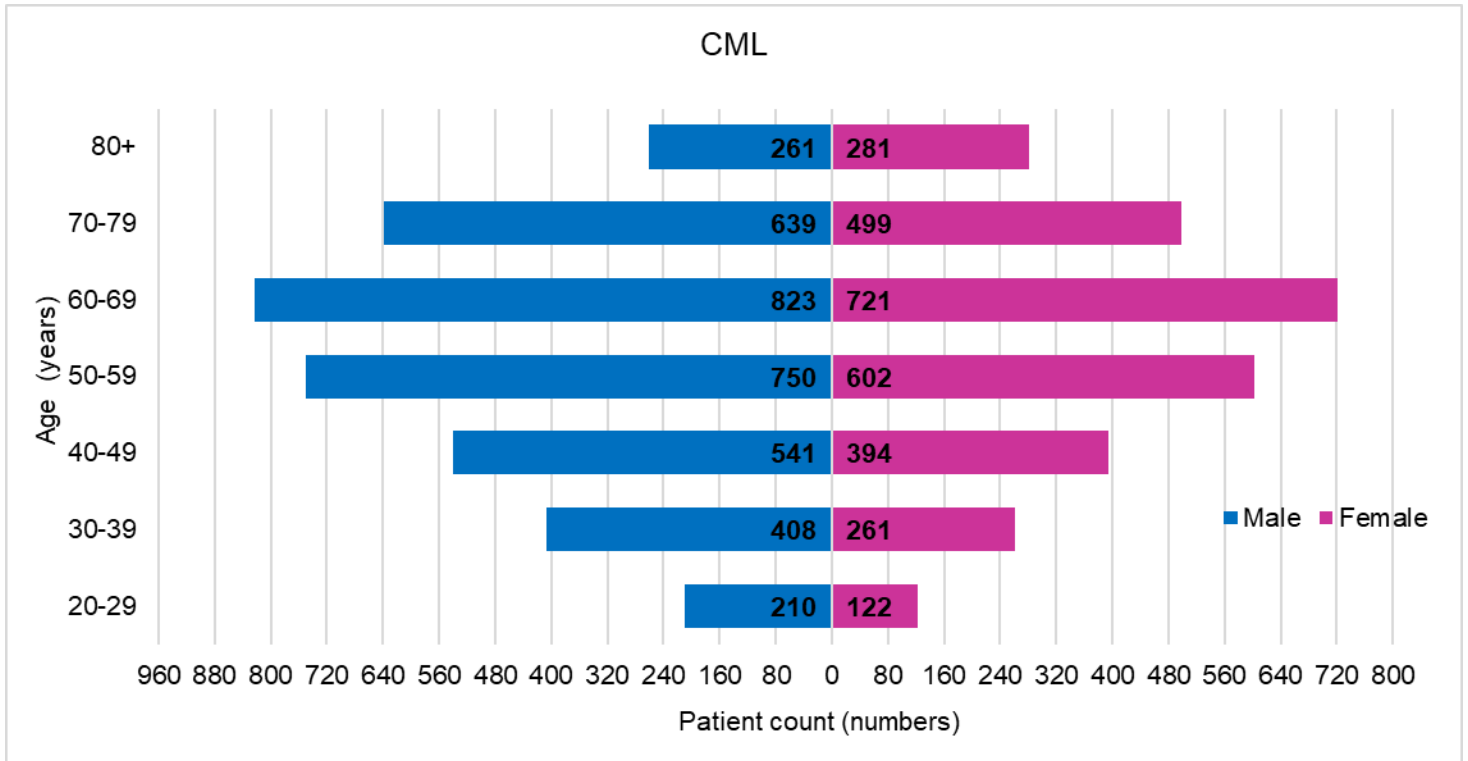

**Figure S6: Overall survival of Patients with Living with Myeloproliferative Neoplasms in the United States between 2000-2021 stratified by Age.** (a) ET: essential thrombocythemia, (b) PV: polycythemia vera (c) PMF: primary myelofibrosis, and (d) CML: chronic myeloid leukemia

6

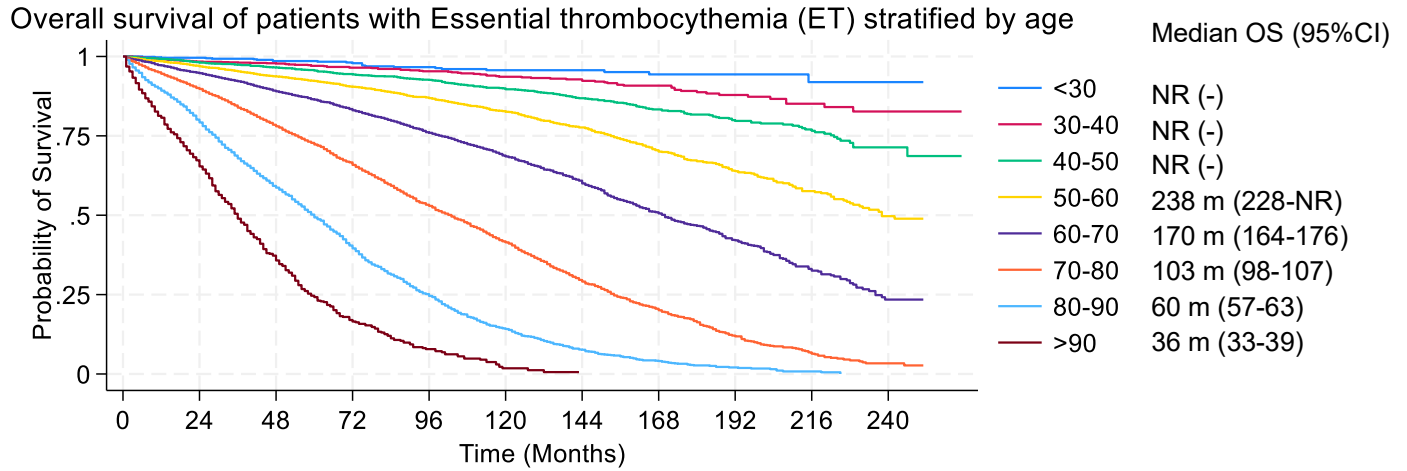

| Number at risk | 0    | 24   | 48   | 72   | 96   | 120  | 144 | 168 | 192 | 216 | 240 |
|----------------|------|------|------|------|------|------|-----|-----|-----|-----|-----|
| <30            | 781  | 652  | 522  | 413  | 332  | 250  | 187 | 126 | 76  | 36  | 14  |
| 30-40          | 1510 | 1232 | 1004 | 785  | 609  | 496  | 401 | 292 | 167 | 89  | 36  |
| 40-50          | 2546 | 2172 | 1802 | 1458 | 1167 | 937  | 733 | 496 | 336 | 180 | 56  |
| 50-60          | 3714 | 3158 | 2566 | 2074 | 1597 | 1261 | 930 | 623 | 373 | 185 | 67  |
| 60-70          | 5573 | 4535 | 3580 | 2723 | 1949 | 1379 | 916 | 559 | 310 | 122 | 27  |
| 70-80          | 5543 | 4293 | 3144 | 2175 | 1390 | 885  | 500 | 260 | 101 | 33  | 7   |
| 80-90          | 3268 | 2324 | 1488 | 853  | 430  | 197  | 83  | 41  | 12  | 3   | 0   |
| >90            | 721  | 420  | 195  | 70   | 24   | 4    | 0   | 0   | 0   | 0   | 0   |

6b

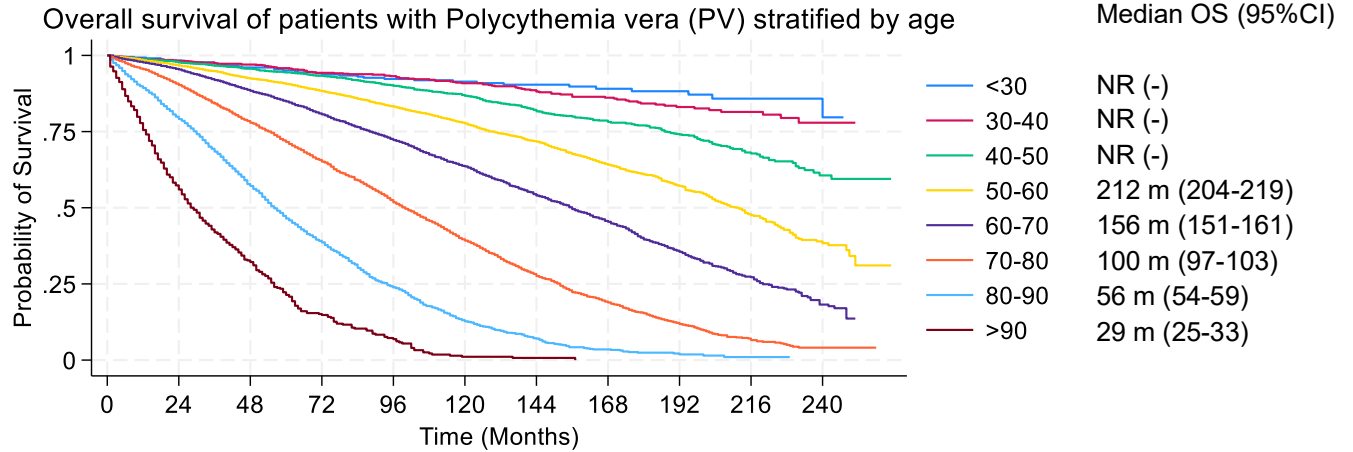

Number at risk

|       | 0    | 24   | 48   | 72   | 96   | 120  | 144  | 168 | 192 | 216 | 240 |
|-------|------|------|------|------|------|------|------|-----|-----|-----|-----|
| <30   | 434  | 372  | 320  | 275  | 232  | 194  | 157  | 119 | 85  | 41  | 14  |
| 30-40 | 1033 | 901  | 770  | 649  | 562  | 469  | 391  | 292 | 193 | 102 | 29  |
| 40-50 | 2603 | 2310 | 2002 | 1730 | 1430 | 1157 | 886  | 674 | 446 | 212 | 63  |
| 50-60 | 4603 | 4022 | 3410 | 2845 | 2250 | 1666 | 1227 | 829 | 519 | 252 | 67  |
| 60-70 | 5880 | 4954 | 3951 | 3046 | 2216 | 1552 | 1052 | 660 | 358 | 153 | 35  |
| 70-80 | 5116 | 4091 | 3042 | 2162 | 1425 | 865  | 497  | 262 | 123 | 39  | 7   |
| 80-90 | 2573 | 1839 | 1142 | 676  | 338  | 140  | 57   | 22  | 7   | 1   | 0   |
| >90   | 517  | 255  | 122  | 48   | 20   | 3    | 1    | 0   | 0   | 0   | 0   |

6c

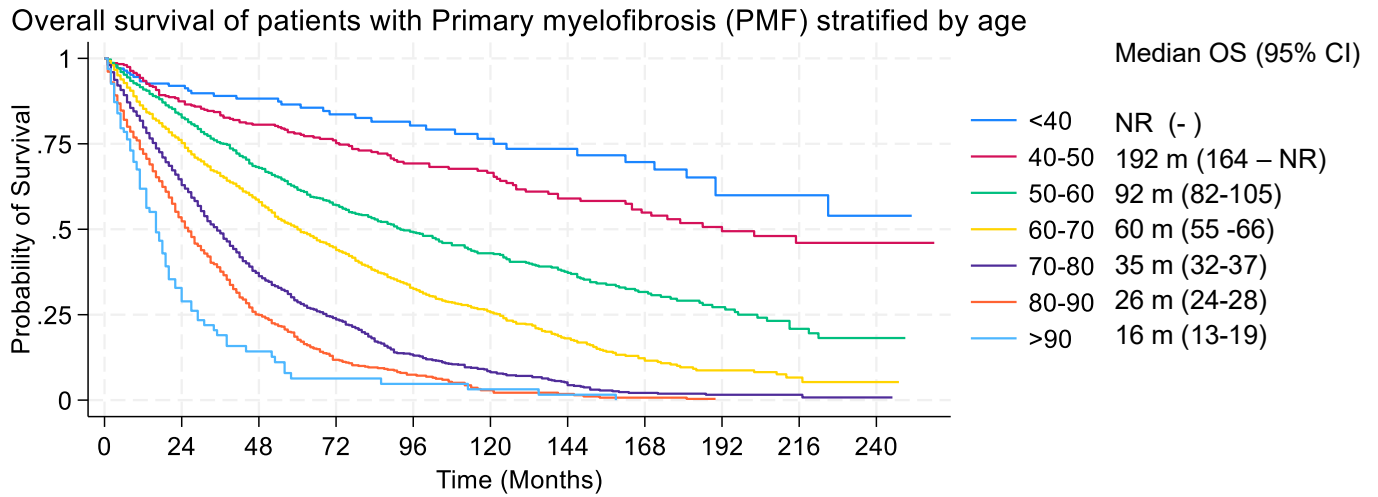

Number at risk

|       | 0    | 24   | 48  | 72  | 96  | 120 | 144 | 168 | 192 | 216 | 240 |
|-------|------|------|-----|-----|-----|-----|-----|-----|-----|-----|-----|
| <40   | 169  | 130  | 107 | 84  | 71  | 53  | 42  | 33  | 23  | 12  | 7   |
| 40-50 | 359  | 287  | 231 | 183 | 139 | 112 | 84  | 61  | 41  | 23  | 4   |
| 50-60 | 912  | 692  | 475 | 344 | 246 | 173 | 119 | 67  | 40  | 16  | 7   |
| 60-70 | 1736 | 1159 | 761 | 462 | 279 | 158 | 76  | 34  | 18  | 5   | 1   |
| 70-80 | 1804 | 1013 | 500 | 272 | 113 | 50  | 25  | 9   | 4   | 2   | 1   |
| 80-90 | 872  | 403  | 158 | 60  | 26  | 8   | 5   | 2   | 0   | 0   | 0   |
| >90   | 96   | 25   | 9   | 4   | 3   | 2   | 1   | 0   | 0   | 0   | 0   |

6d

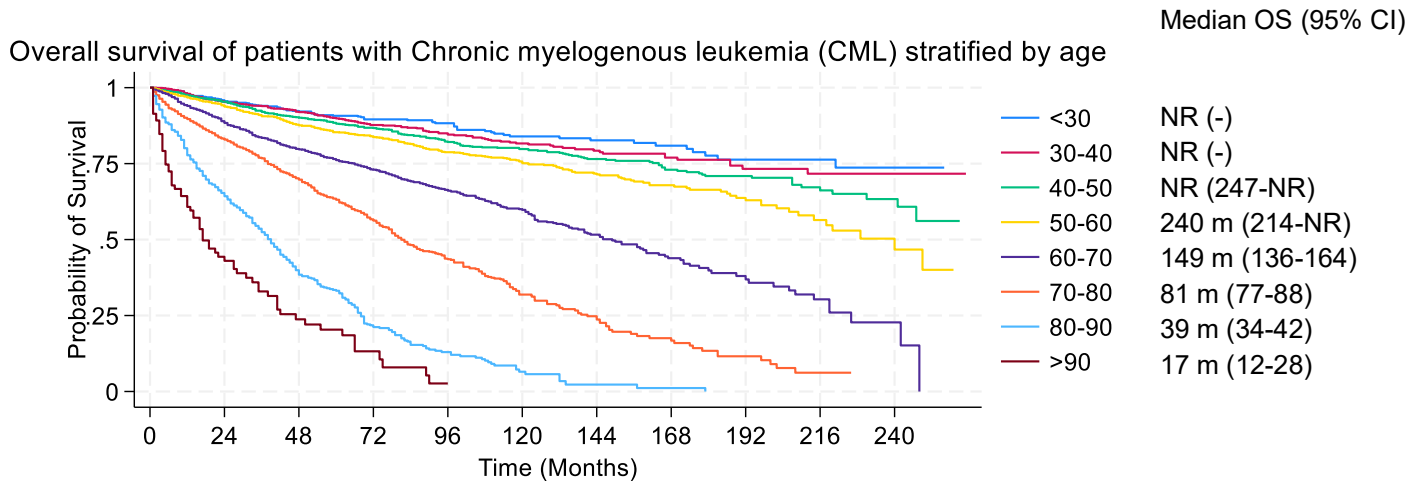

Number at risk

|       |      |      |      |     |     |     |     |     |     |    |    |
|-------|------|------|------|-----|-----|-----|-----|-----|-----|----|----|
| <30   | 739  | 590  | 475  | 369 | 249 | 170 | 117 | 83  | 53  | 32 | 12 |
| 30-40 | 1151 | 905  | 710  | 522 | 390 | 245 | 164 | 113 | 69  | 40 | 11 |
| 40-50 | 1591 | 1286 | 1033 | 797 | 584 | 418 | 266 | 190 | 126 | 66 | 26 |
| 50-60 | 1926 | 1524 | 1188 | 887 | 604 | 392 | 240 | 147 | 84  | 36 | 14 |
| 60-70 | 1899 | 1377 | 987  | 698 | 465 | 268 | 141 | 75  | 34  | 16 | 4  |
| 70-80 | 1326 | 894  | 610  | 391 | 206 | 101 | 46  | 22  | 12  | 4  | 0  |
| 80-90 | 554  | 305  | 161  | 73  | 30  | 9   | 2   | 1   | 0   | 0  | 0  |
| >90   | 93   | 33   | 14   | 5   | 1   | 0   | 0   | 0   | 0   | 0  | 0  |

**Figure S7 – Overall survival of Patients with Living with Myeloproliferative Neoplasms in the United States between 2000-2021 stratified by Race/Ethnicity.** (a) Patients identifying Hispanic (median OS 192 months, 95% CI, 176-209 months) did significantly better than other races living with ET, whereas NHW (median OS 141 months, 95% CI 137-144 months) patients did relatively the worst of all groups with ET. (b) AI/ANs living with PV (median OS 195 months, 95% CI 111 months -NR) also did relatively better than their counterparts, and NHW (median OS 144 months, 95% CI 141-147 months) did relatively worse. (c) Hispanic patients living with PMF (median OS 42 months, 95% CI 38-48 months) did worse than their counterparts, whereas A/PI living with PMF (median OS 68 months, 95% CI 54-80 months) did relatively better than other racial groups. (d) Hispanic patients living with CML (median OS 210 months, 95% CI 175-NR) did relatively better than other racial groups, and NHB (median OS 164 months, 95% CI 145-194 months) did relatively worse.

7a

Overall survival of patients with Essential thrombocythemia (ET) stratified by Race/Ethnicity

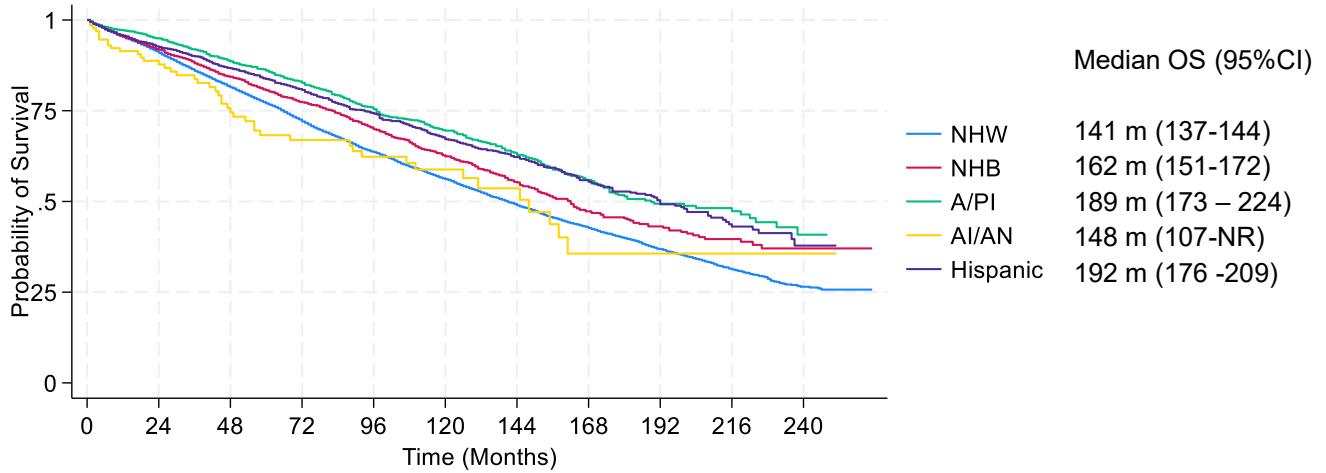

Number at risk

|          | 0     | 24    | 48    | 72   | 96   | 120  | 144  | 168  | 192 | 216 | 240 |
|----------|-------|-------|-------|------|------|------|------|------|-----|-----|-----|
| NHW      | 16592 | 13225 | 10037 | 7338 | 5174 | 3752 | 2603 | 1692 | 983 | 455 | 145 |
| NHB      | 2736  | 2156  | 1648  | 1189 | 850  | 602  | 372  | 215  | 121 | 58  | 21  |
| A/PI     | 1758  | 1432  | 1120  | 863  | 623  | 439  | 311  | 195  | 108 | 56  | 18  |
| AI/AN    | 131   | 90    | 63    | 47   | 40   | 27   | 17   | 8    | 5   | 3   | 1   |
| Hispanic | 2103  | 1623  | 1244  | 963  | 703  | 513  | 387  | 250  | 135 | 68  | 18  |

**7b**

Overall survival of patients with Polycythemia vera (PV) stratified by Race/Ethnicity

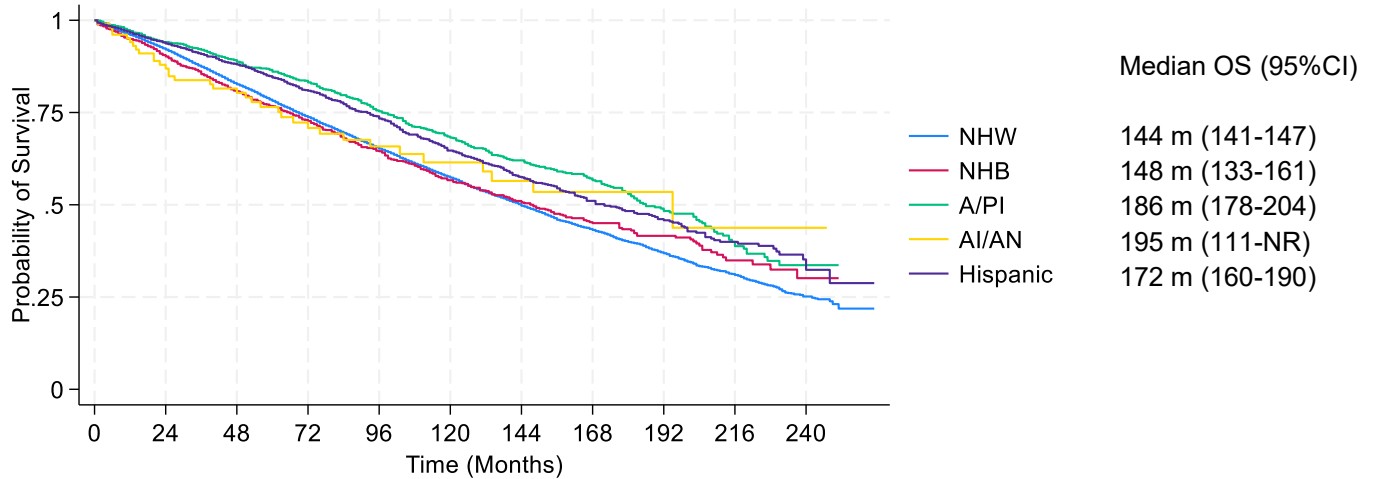

Number at risk

|          | 0     | 24    | 48    | 72   | 96   | 120  | 144  | 168  | 192  | 216 | 240 |
|----------|-------|-------|-------|------|------|------|------|------|------|-----|-----|
| NHW      | 17626 | 14608 | 11464 | 8837 | 6535 | 4659 | 3269 | 2181 | 1304 | 603 | 161 |
| NHB      | 1435  | 1155  | 907   | 699  | 513  | 341  | 249  | 163  | 97   | 37  | 11  |
| A/PI     | 1424  | 1188  | 953   | 777  | 597  | 450  | 324  | 232  | 145  | 68  | 15  |
| AI/AN    | 105   | 85    | 69    | 48   | 35   | 25   | 20   | 13   | 11   | 6   | 2   |
| Hispanic | 1895  | 1506  | 1221  | 963  | 712  | 506  | 356  | 233  | 150  | 80  | 25  |

**7c**

Overall survival of patients with Primary myelofibrosis (PMF) stratified by Race/Ethnicity

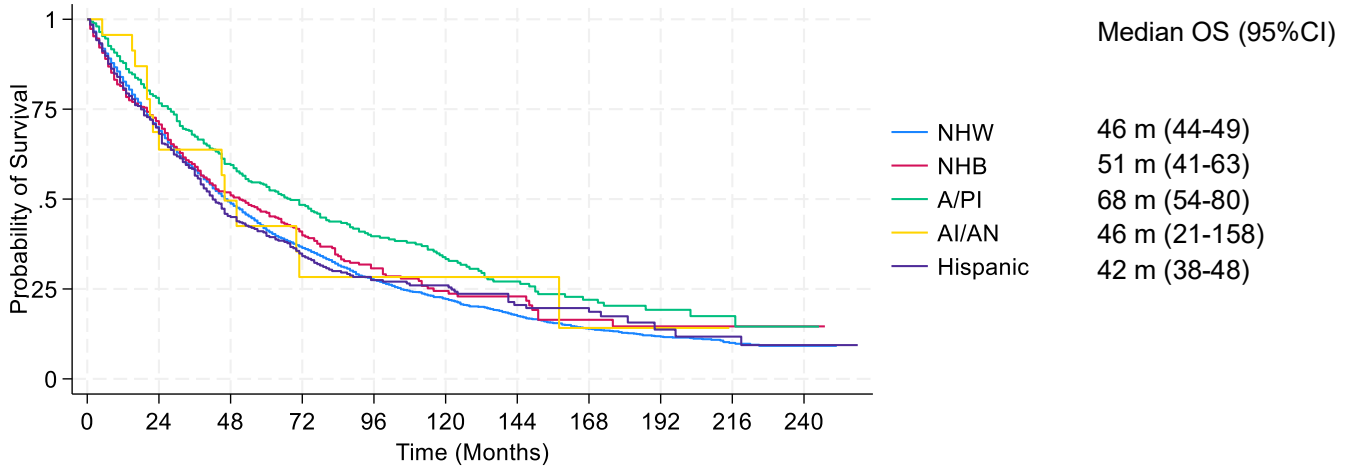

Number at risk

|          | 0    | 24   | 48   | 72   | 96  | 120 | 144 | 168 | 192 | 216 | 240 |
|----------|------|------|------|------|-----|-----|-----|-----|-----|-----|-----|
| NHW      | 4454 | 2764 | 1668 | 1043 | 649 | 405 | 260 | 147 | 94  | 43  | 13  |
| NHB      | 486  | 305  | 181  | 111  | 58  | 32  | 20  | 10  | 7   | 3   | 2   |
| A/PI     | 456  | 304  | 204  | 141  | 93  | 64  | 40  | 27  | 16  | 6   | 2   |
| AI/AN    | 23   | 14   | 7    | 4    | 4   | 2   | 2   | 1   | 1   | 0   | 0   |
| Hispanic | 468  | 285  | 155  | 95   | 63  | 45  | 25  | 19  | 7   | 5   | 3   |

7d

Overall survival of patients with Chronic myelogenous leukemia (CML) stratified by Race/Ethnicity

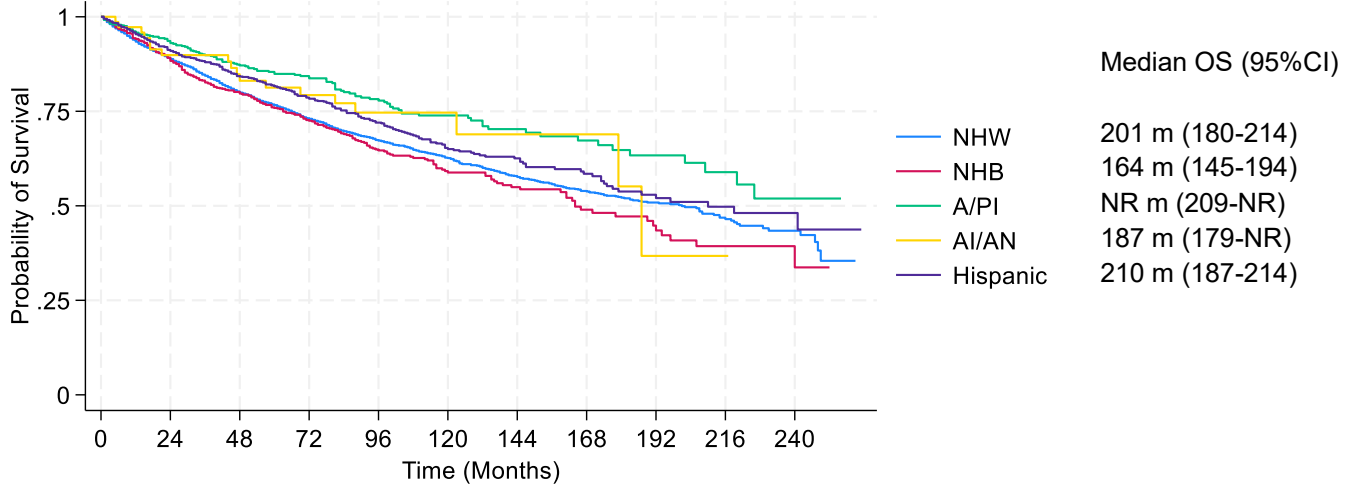

Number at risk

|          | 0    | 24   | 48   | 72   | 96   | 120  | 144 | 168 | 192 | 216 | 240 |
|----------|------|------|------|------|------|------|-----|-----|-----|-----|-----|
| NHW      | 6083 | 4563 | 3425 | 2443 | 1683 | 1073 | 635 | 410 | 239 | 122 | 41  |
| NHB      | 1055 | 761  | 563  | 407  | 248  | 156  | 98  | 59  | 35  | 18  | 7   |
| A/PI     | 623  | 491  | 370  | 282  | 195  | 119  | 78  | 56  | 38  | 20  | 7   |
| AI/AN    | 75   | 58   | 50   | 40   | 27   | 14   | 9   | 5   | 2   | 1   | 0   |
| Hispanic | 1340 | 963  | 719  | 526  | 344  | 217  | 140 | 92  | 59  | 31  | 11  |

**Figure S8: Overall survival of Patients with Living with Myeloproliferative Neoplasms in the United States between 2000-2021 stratified by Sex and Race/Ethnicity. (a) AAPI females with ET had the best OS in our cohort, whereas NHW males with ET had the worst median OS. (b) Hispanic males fared the best of all race-gender subgroups with PV, and NHW females had the most inferior survival of all groups. (c) Hispanic and NHW males along with NHB females had inferior median survival and AI/AN females did better compared to other race-gender groups living with PMF. (d) A/PI females did better and NHB males did worse than other race-gender groups with CML**

**8a**

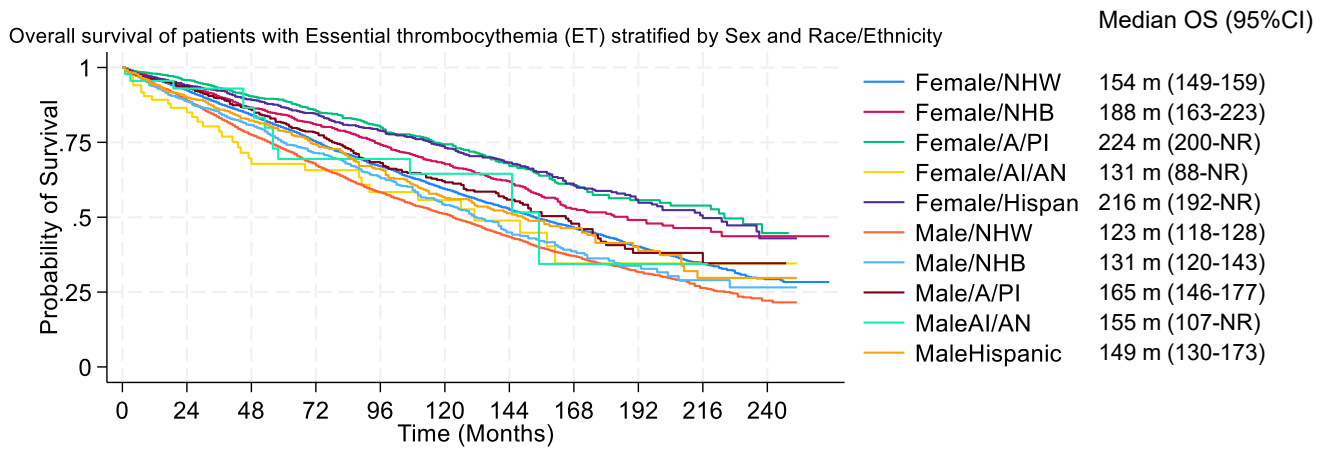

| Number at risk  | 0     | 24   | 48   | 72   | 96   | 120  | 144  | 168  | 192 | 216 | 240 |
|-----------------|-------|------|------|------|------|------|------|------|-----|-----|-----|
| Female/NHW      | 10224 | 8233 | 6351 | 4680 | 3334 | 2412 | 1683 | 1114 | 641 | 304 | 100 |
| Female/NHB      | 1709  | 1374 | 1044 | 759  | 540  | 399  | 251  | 145  | 87  | 38  | 16  |
| Female/A/PI     | 1099  | 899  | 708  | 549  | 406  | 289  | 209  | 141  | 81  | 45  | 13  |
| Female/AI/AN    | 86    | 56   | 37   | 29   | 24   | 18   | 12   | 6    | 4   | 2   | 1   |
| Female/Hispanic | 1349  | 1056 | 809  | 646  | 483  | 361  | 280  | 186  | 105 | 56  | 16  |
| Male/NHW        | 6368  | 4992 | 3686 | 2658 | 1840 | 1340 | 920  | 578  | 342 | 151 | 45  |
| Male/NHB        | 1027  | 782  | 604  | 430  | 310  | 203  | 121  | 70   | 34  | 20  | 5   |
| Male/A/PI       | 659   | 533  | 412  | 314  | 217  | 150  | 102  | 54   | 27  | 11  | 5   |
| Male/AI/AN      | 45    | 34   | 26   | 18   | 16   | 9    | 5    | 2    | 1   | 1   | 0   |
| Male/Hispanic   | 754   | 567  | 435  | 317  | 220  | 152  | 107  | 64   | 30  | 12  | 2   |

**8b**

Overall survival of patients with Polycythemia vera (PV) stratified by Sex and Race/Ethnicity

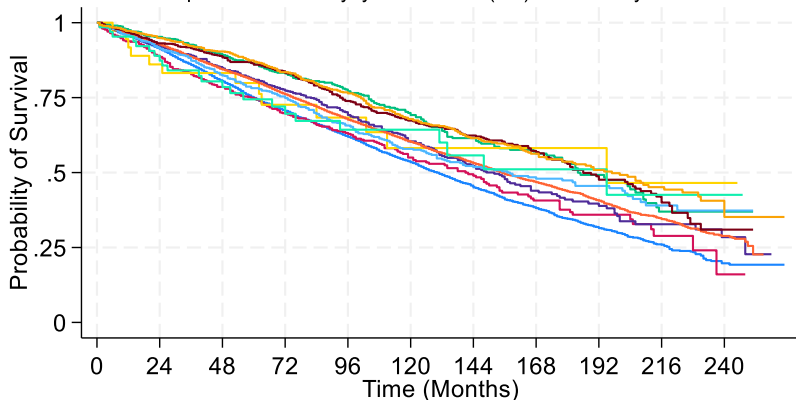

Median OS (95%CI)

|                 |                   |
|-----------------|-------------------|
| Female/NHW      | 130 m (126-135)   |
| Female/NHB      | 141 m (119-154)   |
| Female/A/PI     | 184 m (172 - 209) |
| Female/AI/AN    | 195 m (84-NR)     |
| Female/Hispanic | 152 m (138 -166)  |
| Male/NHW        | 155 m (151-161)   |
| Male/NHB        | 158 m (132-196)   |
| Male/A/PI       | 186 m (173-208)   |
| MaleAI/AN       | 195 m (93-NR)     |
| MaleHispanic    | 197 m (172-217)   |

Number at risk

|                 |       |      |      |      |      |      |      |      |     |     |     |
|-----------------|-------|------|------|------|------|------|------|------|-----|-----|-----|
| Female/NHW      | 7604  | 6203 | 4791 | 3572 | 2580 | 1802 | 1213 | 756  | 429 | 194 | 46  |
| Female/NHB      | 609   | 486  | 377  | 284  | 202  | 135  | 95   | 58   | 35  | 10  | 2   |
| Female/A/PI     | 636   | 538  | 422  | 341  | 266  | 196  | 133  | 91   | 61  | 26  | 6   |
| Female/AI/AN    | 39    | 30   | 27   | 18   | 14   | 10   | 8    | 5    | 5   | 3   | 1   |
| Female/Hispanic | 795   | 624  | 496  | 393  | 289  | 208  | 137  | 80   | 51  | 24  | 10  |
| Male/NHW        | 10022 | 8405 | 6673 | 5265 | 3955 | 2857 | 2056 | 1425 | 875 | 409 | 115 |
| Male/NHB        | 826   | 669  | 530  | 415  | 311  | 206  | 154  | 105  | 62  | 27  | 9   |
| Male/A/PI       | 788   | 650  | 531  | 436  | 331  | 254  | 191  | 141  | 84  | 42  | 9   |
| Male/AI/AN      | 66    | 55   | 42   | 30   | 21   | 15   | 12   | 8    | 6   | 3   | 1   |
| Male/Hispanic   | 1100  | 882  | 725  | 570  | 423  | 298  | 219  | 153  | 99  | 56  | 15  |

8c

Overall survival of patients with Primary myelofibrosis (PMF) stratified by Sex and Race/Ethnicity

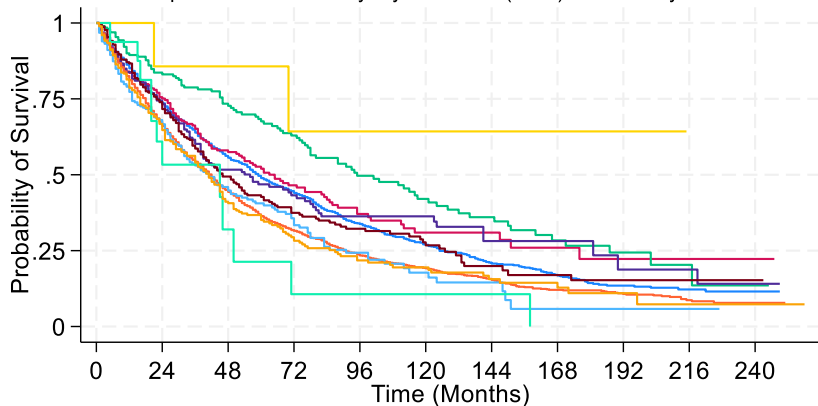

Median OS (95%CI)

|                 |                |
|-----------------|----------------|
| Female/NHW      | 59 m (55-64)   |
| Female/NHB      | 65 m (51-83)   |
| Female/A/PI     | 95 m (78 -121) |
| Female/AI/AN    | NR (NR)        |
| Female/Hispanic | 56 m (38-76)   |
| Male/NHW        | 42 m (39-44)   |
| Male/NHB        | 41 m (32-51)   |
| Male/A/PI       | 46 m (39-55)   |
| MaleAI/AN       | 45 m (20-50)   |
| MaleHispanic    | 41 m (33-46)   |

Number at risk

|                 |      |      |     |     |     |     |     |    |    |    |   |
|-----------------|------|------|-----|-----|-----|-----|-----|----|----|----|---|
| Female/NHW      | 1714 | 1129 | 748 | 501 | 314 | 191 | 123 | 73 | 42 | 19 | 7 |
| Female/NHB      | 237  | 157  | 102 | 64  | 36  | 21  | 14  | 8  | 5  | 2  | 2 |
| Female/A/PI     | 198  | 142  | 106 | 80  | 50  | 36  | 26  | 16 | 10 | 3  | 1 |
| Female/AI/AN    | 7    | 6    | 4   | 3   | 3   | 1   | 1   | 1  | 1  | 0  | 0 |
| Female/Hispanic | 193  | 122  | 68  | 45  | 32  | 22  | 11  | 10 | 4  | 4  | 2 |
| Male/NHW        | 2740 | 1635 | 920 | 542 | 335 | 214 | 137 | 74 | 52 | 24 | 6 |
| Male/NHB        | 249  | 148  | 79  | 47  | 22  | 11  | 6   | 2  | 2  | 1  | 0 |
| Male/A/PI       | 258  | 162  | 98  | 61  | 43  | 28  | 14  | 11 | 6  | 3  | 1 |
| Male/AI/AN      | 16   | 8    | 3   | 1   | 1   | 1   | 1   | 0  | 0  | 0  | 0 |
| Male/Hispanic   | 275  | 163  | 87  | 50  | 31  | 23  | 14  | 9  | 3  | 1  | 1 |

8d

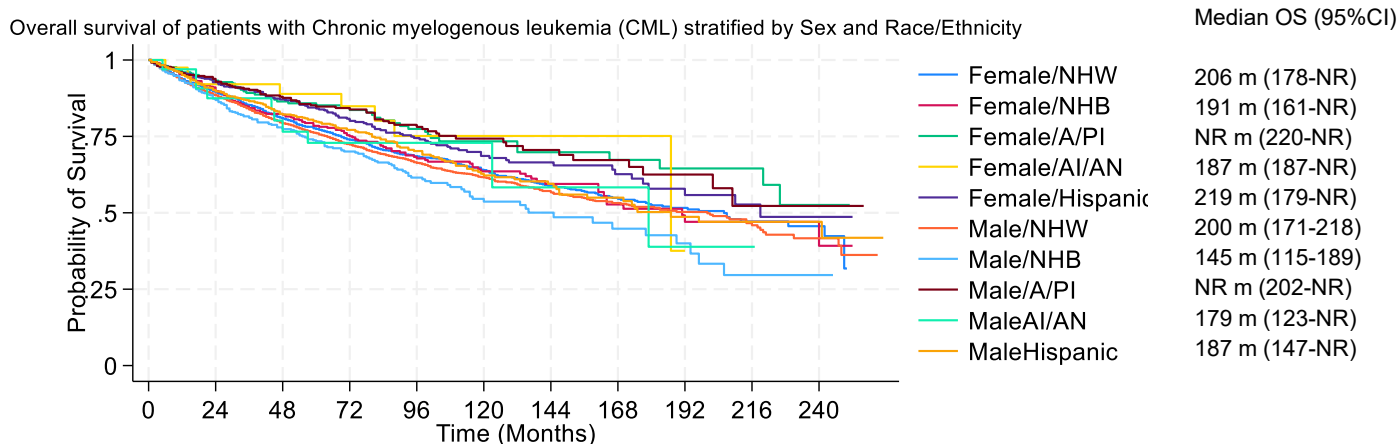

| Number at risk  |      |      |      |      |     |     |     |     |     |     |     |
|-----------------|------|------|------|------|-----|-----|-----|-----|-----|-----|-----|
|                 | 0    | 24   | 48   | 72   | 96  | 120 | 144 | 168 | 192 | 216 | 240 |
| Female/NHW      | 2626 | 1979 | 1476 | 1065 | 741 | 461 | 266 | 177 | 108 | 54  | 16  |
| Female/NHB      | 519  | 375  | 288  | 215  | 135 | 96  | 65  | 37  | 23  | 12  | 6   |
| Female/A/PI     | 259  | 195  | 148  | 110  | 80  | 52  | 32  | 26  | 20  | 13  | 4   |
| Female/AI/AN    | 41   | 32   | 28   | 21   | 14  | 8   | 6   | 2   | 1   | 0   | 0   |
| Female/Hispanic | 554  | 405  | 305  | 226  | 163 | 103 | 68  | 43  | 28  | 14  | 2   |
| Male/NHW        | 3457 | 2584 | 1949 | 1378 | 942 | 612 | 369 | 233 | 131 | 68  | 25  |
| Male/NHB        | 536  | 386  | 275  | 192  | 113 | 60  | 33  | 22  | 12  | 6   | 1   |
| Male/A/PI       | 364  | 296  | 222  | 172  | 115 | 67  | 46  | 30  | 18  | 7   | 3   |
| Male/AI/AN      | 34   | 26   | 22   | 19   | 13  | 6   | 3   | 3   | 1   | 1   | 0   |
| Male/Hispanic   | 786  | 558  | 414  | 300  | 181 | 114 | 72  | 49  | 31  | 17  | 9   |

**Figure S9: Age adjusted Overall Survival curves for patients living with Myeloproliferative Neoplasms in the United States between 2000-2021**

9a

Age adjusted survival curve -ET

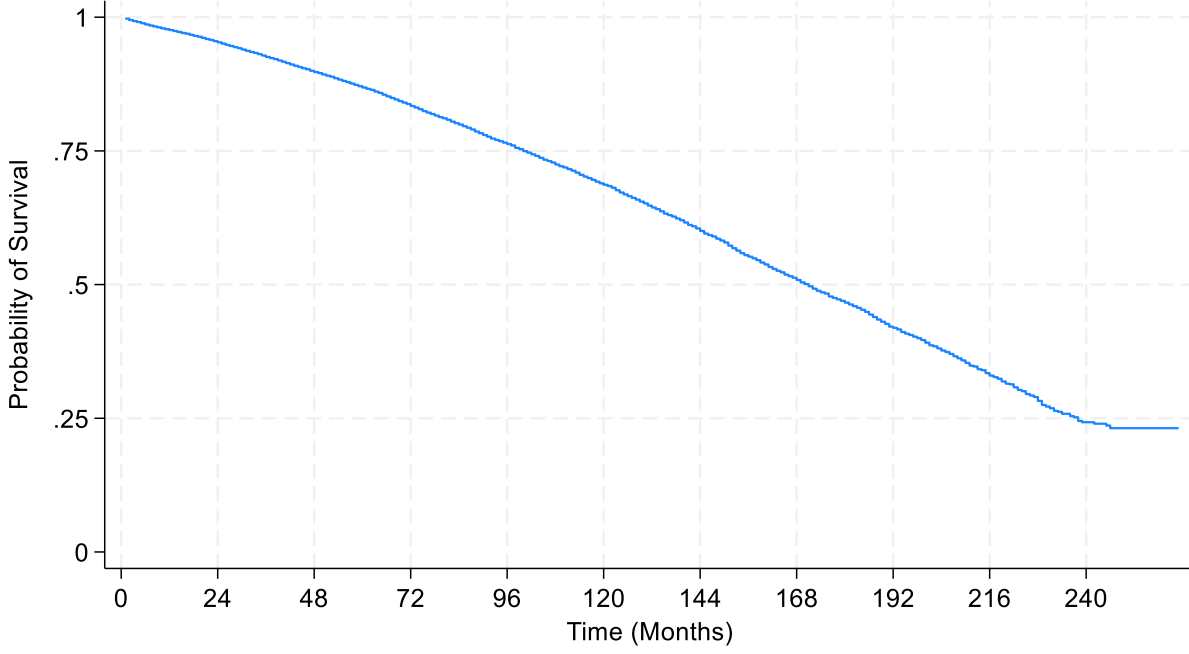

9b

Age adjusted survival curve -PV

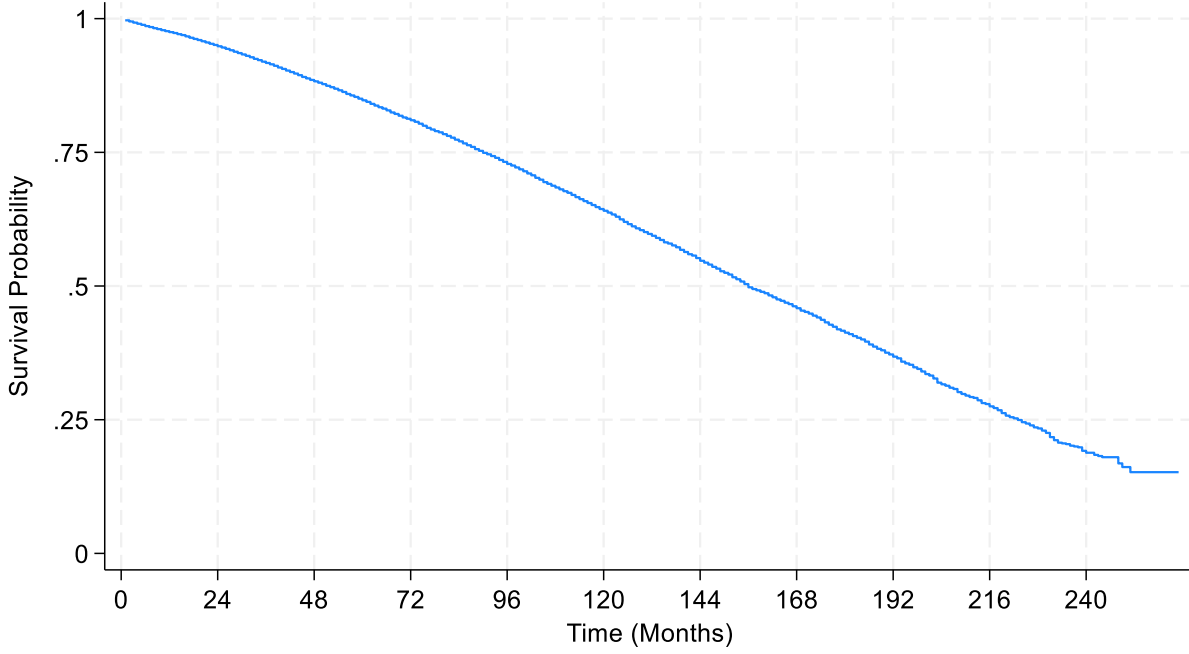

9c

Age adjusted survival curve -PMF

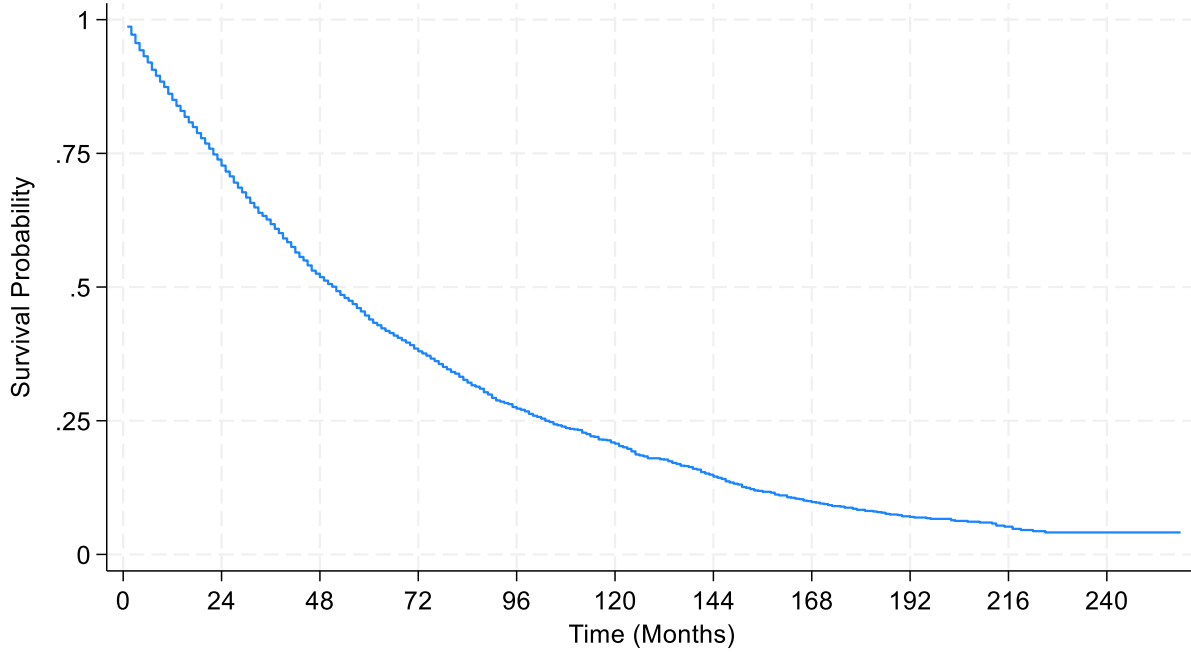

9d

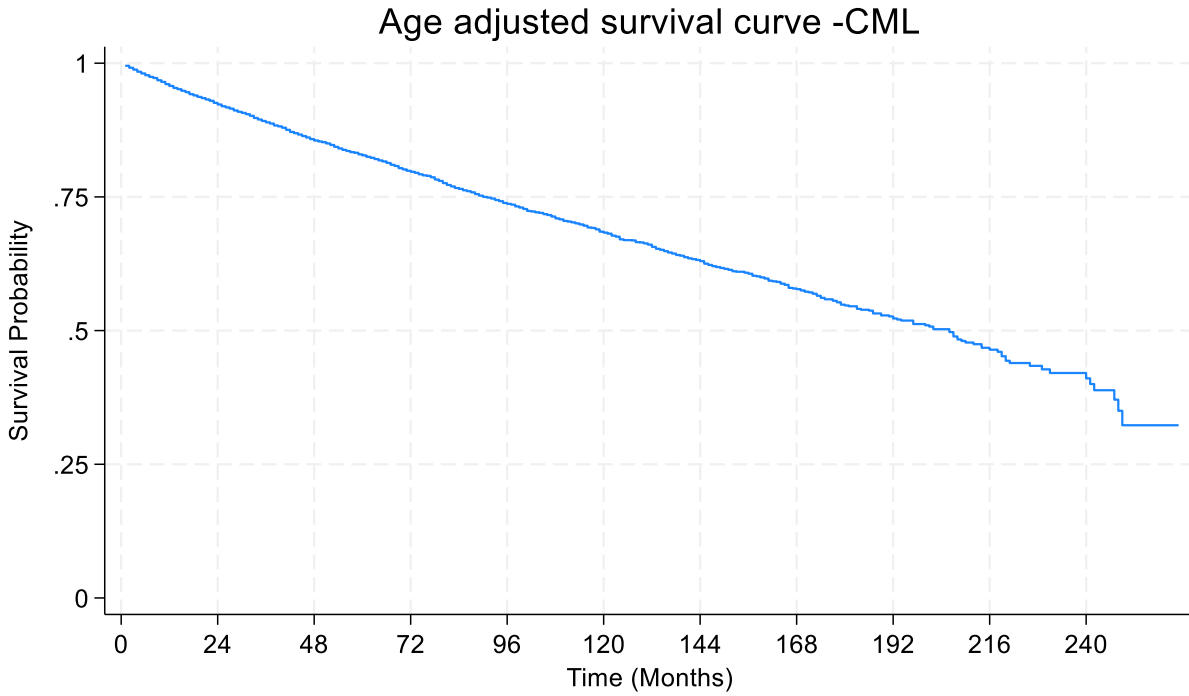

**Figure S10- Overall Survival curves for patients living with Myeloproliferative Neoplasms in the United States between 2000-2021 stratified by Year of Diagnosis**

10a

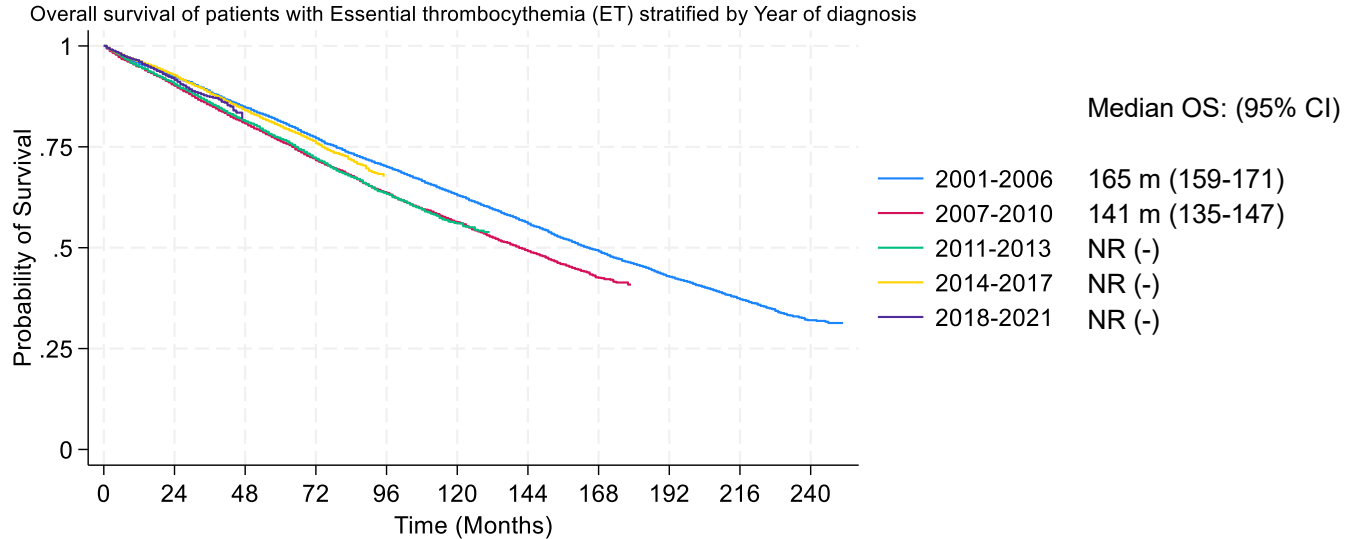

Number at risk

|           |      |      |      |      |      |      |      |      |      |     |     |
|-----------|------|------|------|------|------|------|------|------|------|-----|-----|
| 2001-2006 | 4160 | 3833 | 3517 | 3202 | 2892 | 2597 | 2289 | 1988 | 1371 | 645 | 205 |
| 2007-2010 | 4132 | 3722 | 3318 | 2930 | 2564 | 2246 | 1455 | 403  | 0    | 0   | 0   |
| 2011-2013 | 3356 | 3039 | 2702 | 2371 | 2036 | 560  | 0    | 0    | 0    | 0   | 0   |
| 2014-2017 | 5851 | 5348 | 4758 | 2042 | 0    | 0    | 0    | 0    | 0    | 0   | 0   |
| 2018-2021 | 6151 | 2838 | 0    | 0    | 0    | 0    | 0    | 0    | 0    | 0   | 0   |

10b

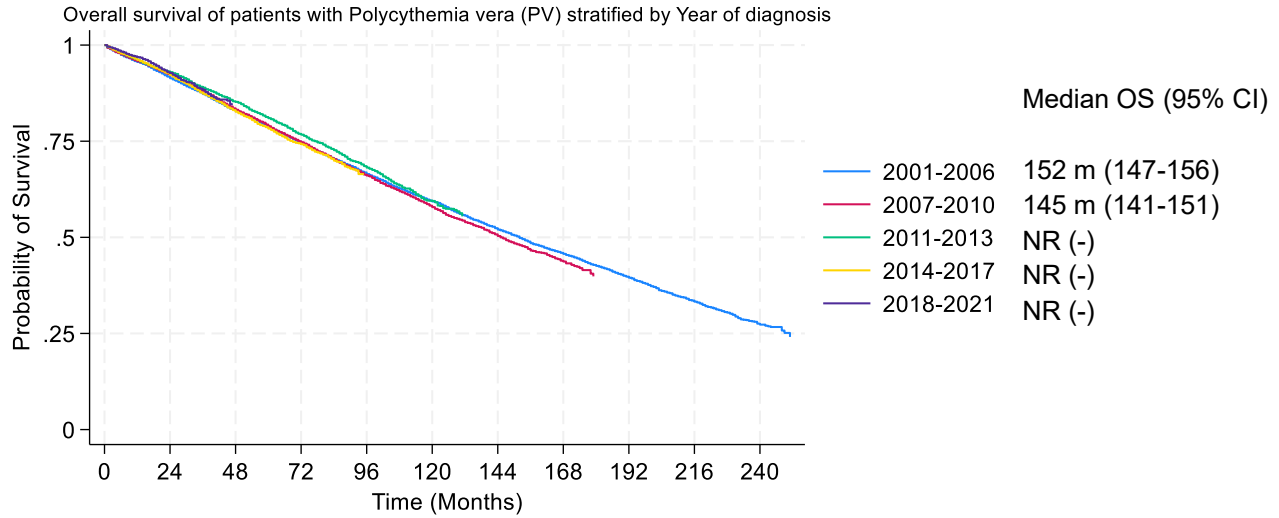

Number at risk

|           |      |      |      |      |      |      |      |      |      |     |     |
|-----------|------|------|------|------|------|------|------|------|------|-----|-----|
| 2001-2006 | 5531 | 5061 | 4569 | 4105 | 3650 | 3237 | 2833 | 2456 | 1722 | 793 | 209 |
| 2007-2010 | 3960 | 3647 | 3282 | 2929 | 2573 | 2236 | 1426 | 393  | 0    | 0   | 0   |
| 2011-2013 | 3408 | 3148 | 2862 | 2563 | 2241 | 564  | 0    | 0    | 0    | 0   | 0   |
| 2014-2017 | 5020 | 4587 | 4036 | 1824 | 0    | 0    | 0    | 0    | 0    | 0   | 0   |
| 2018-2021 | 4830 | 2291 | 0    | 0    | 0    | 0    | 0    | 0    | 0    | 0   | 0   |

10c

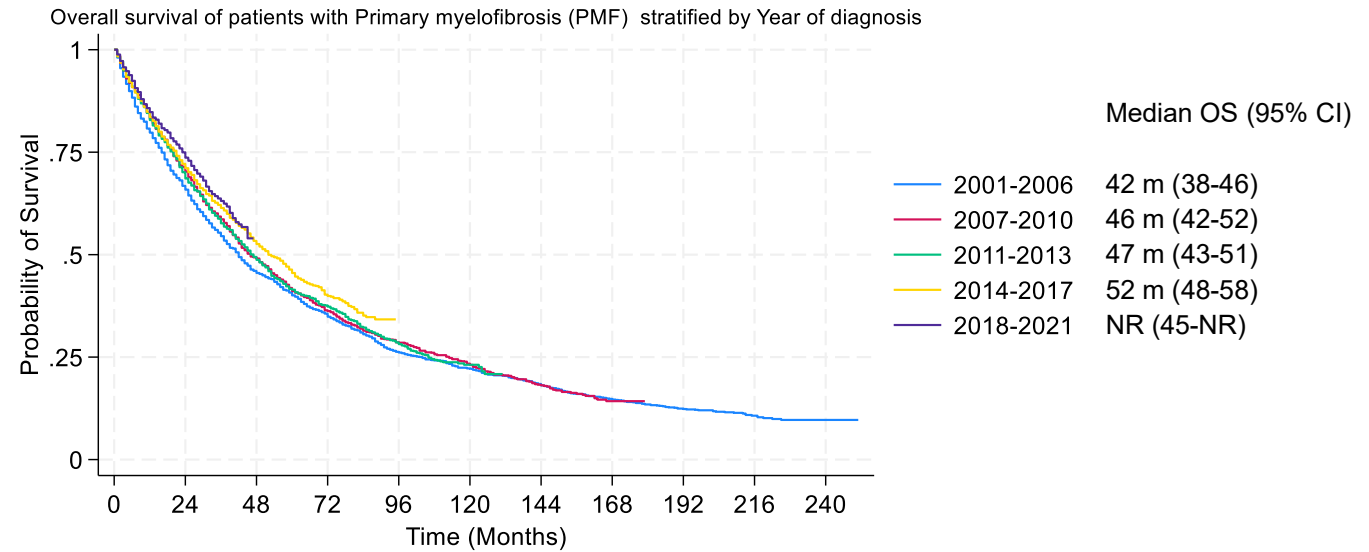

Number at risk

|           |      |     |     |     |     |     |     |     |     |    |    |
|-----------|------|-----|-----|-----|-----|-----|-----|-----|-----|----|----|
| 2001-2006 | 1198 | 796 | 548 | 424 | 313 | 264 | 218 | 175 | 125 | 57 | 19 |
| 2007-2010 | 1043 | 738 | 510 | 373 | 293 | 237 | 132 | 29  | 0   | 0  | 0  |
| 2011-2013 | 987  | 688 | 482 | 363 | 269 | 53  | 0   | 0   | 0   | 0  | 0  |
| 2014-2017 | 1358 | 962 | 699 | 247 | 0   | 0   | 0   | 0   | 0   | 0  | 0  |
| 2018-2021 | 1359 | 523 | 0   | 0   | 0   | 0   | 0   | 0   | 0   | 0  | 0  |

10d

Overall survival of patients with Chronic myelogenous leukemia (CML) stratified by Year of diagnosis

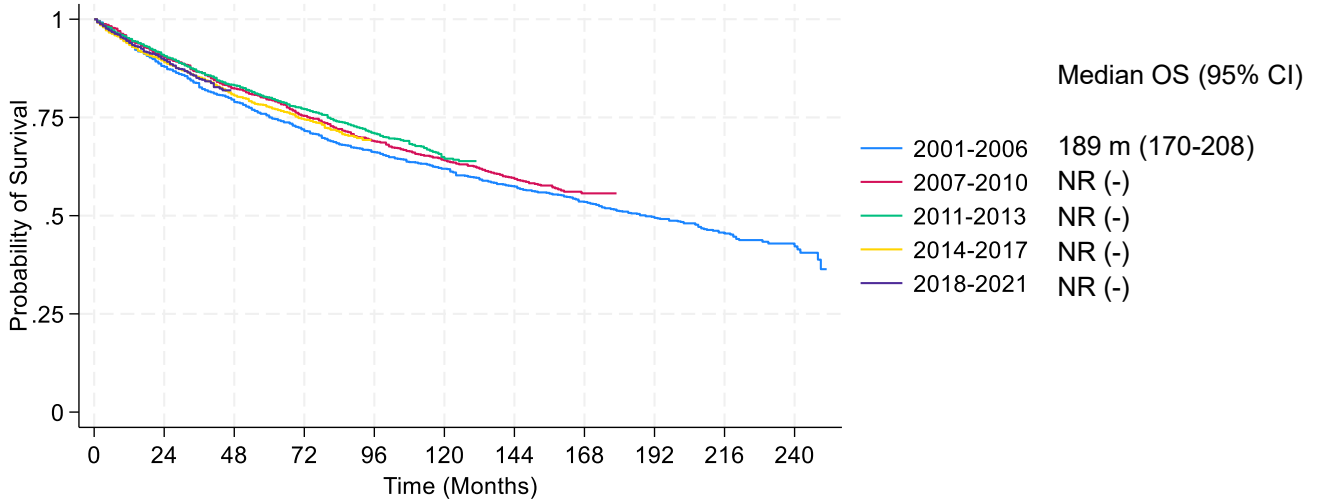

Number at risk

|           |      |      |      |      |      |     |     |     |     |     |    |
|-----------|------|------|------|------|------|-----|-----|-----|-----|-----|----|
| 2001-2006 | 978  | 856  | 770  | 691  | 635  | 588 | 544 | 504 | 369 | 185 | 59 |
| 2007-2010 | 1136 | 1021 | 925  | 842  | 761  | 702 | 421 | 117 | 0   | 0   | 0  |
| 2011-2013 | 1658 | 1494 | 1360 | 1244 | 1122 | 302 | 0   | 0   | 0   | 0   | 0  |
| 2014-2017 | 2720 | 2385 | 2108 | 954  | 0    | 0   | 0   | 0   | 0   | 0   | 0  |
| 2018-2021 | 2768 | 1142 | 0    | 0    | 0    | 0   | 0   | 0   | 0   | 0   | 0  |

Figure S11 – Distribution of MPNs by Method of Diagnosis using SEER-17 (a) ET (b) PV (c) PMF (d) CML

11a

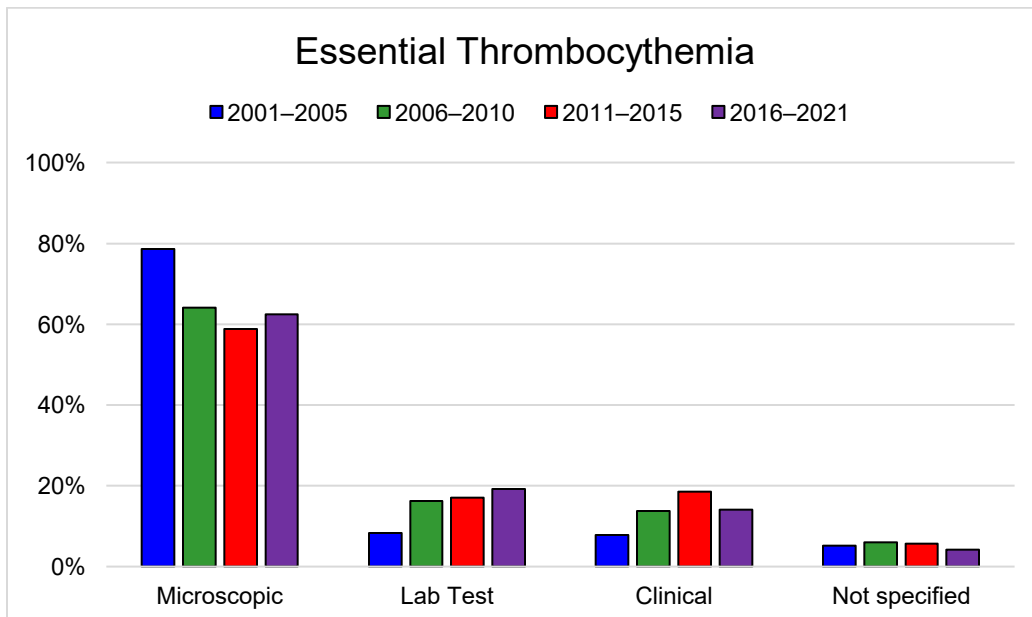

11b

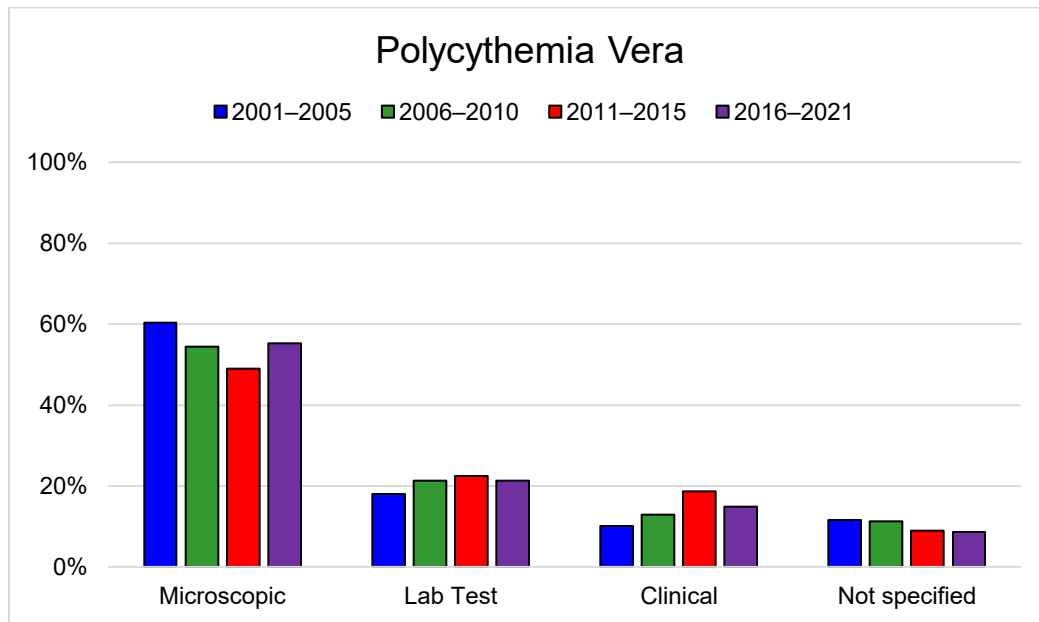

11c

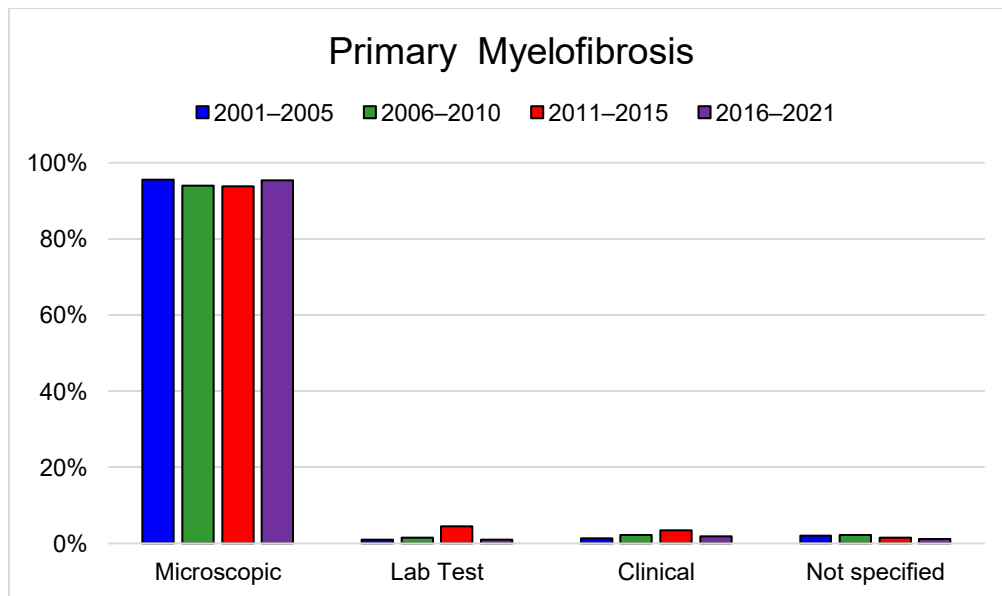

11d

### Chronic Myeloid leukemia, BCR ABL positive

■ 2001-2005 ■ 2006-2010 ■ 2011-2015 ■ 2016-2021

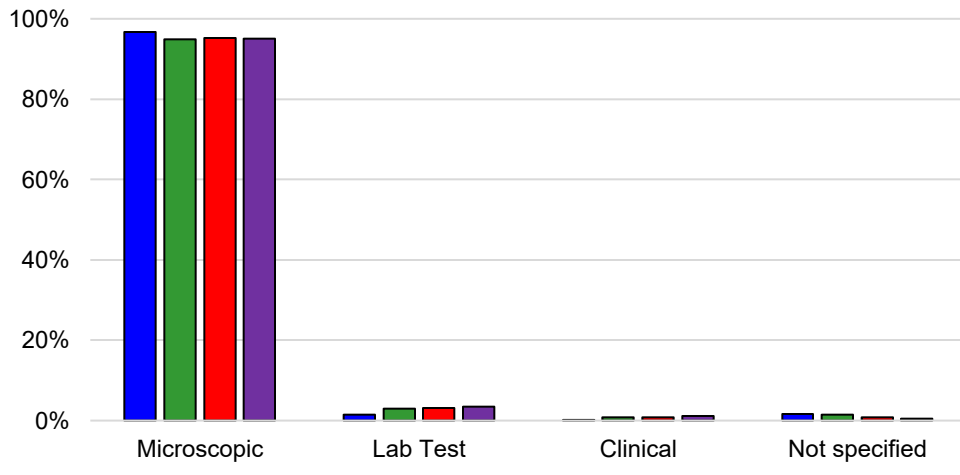

Supplement: Supplementary file 1 [file 39a13750aad09d2f4d723e4e.pdf]
