# Supplementary material for: Incidence, Prevalence, and Survival Outcomes of Patients with Myeloproliferative Neoplasms in the United States: a SEER database analysis, years 2000–2021
Source: Research Square preprint supplement (doi:10.21203/rs.3.rs-9510524/v1), 2026-05-06
Supplement: Supplementary file 2 [file 6c5d2291456c95d3c8c6d6fd.docx]

**Figure 1:** Median age of diagnosis with myeloid neoplasms in the United States between years 2001-2021. AML: acute myeloid leukemia, CML: chronic myeloid leukemia, ET: essential thrombocythemia, MDS: myelodysplastic syndromes, PMF: primary myelofibrosis, PV: polycythemia vera

**
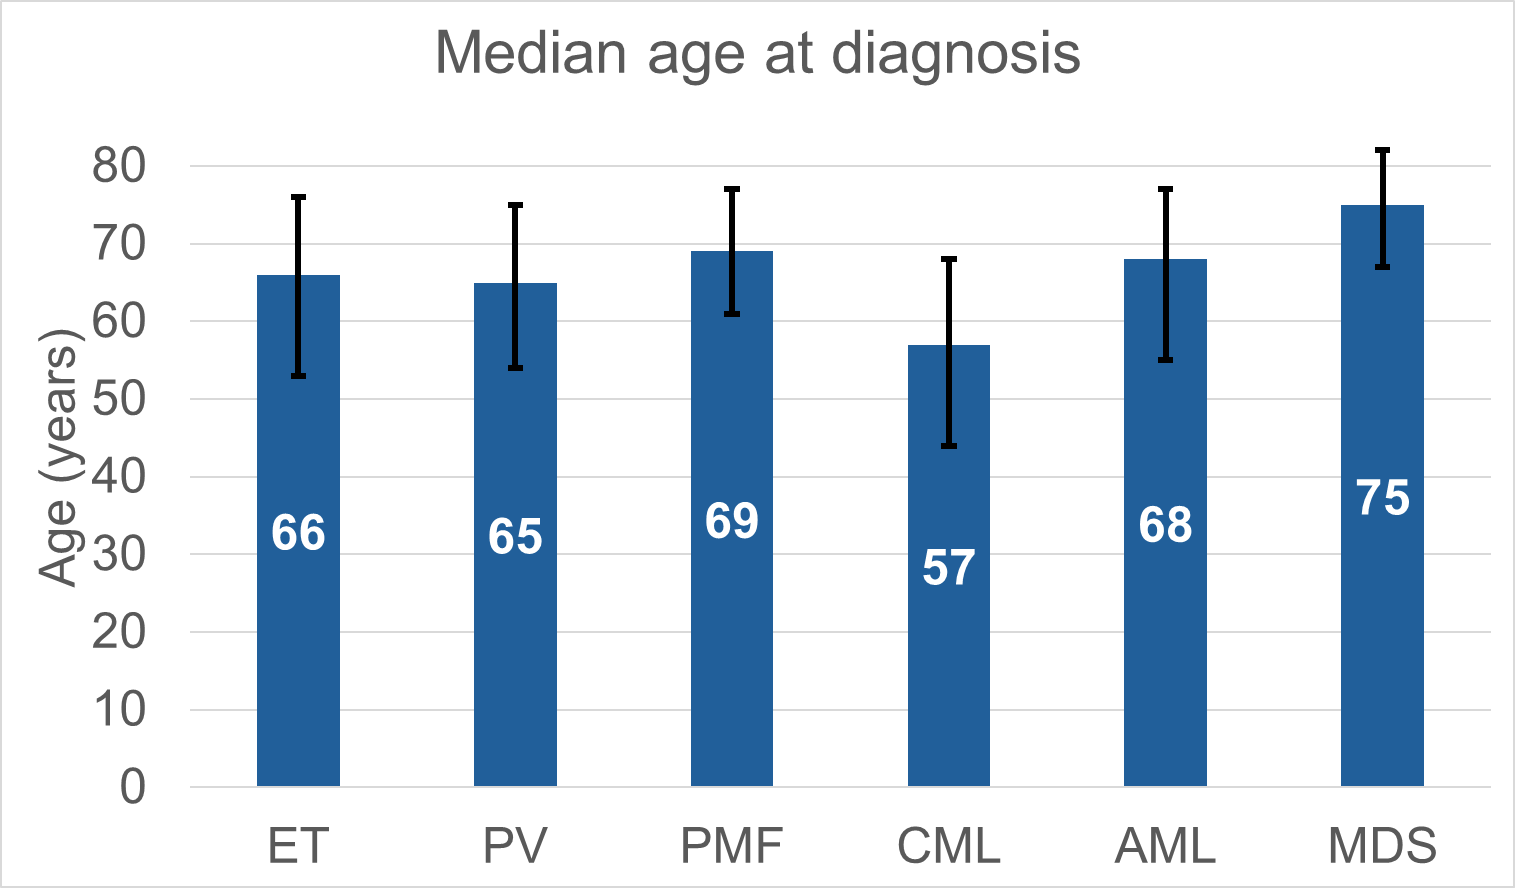
**

**Figure 2:** Incidence rate (IR) by year of diagnosis and gender for those diagnosed between years 2001 and 2021 for (a) ET: essential thrombocythemia, (b) PV: polycythemia vera (c) PMF: primary myelofibrosis, and (d) CML: chronic myeloid leukemia. The overall and 2021 specific IR were as follows: ET (1.84, 2.21 per 100,000 person-years), PV (1.78, 1.64 per 100,000 person-years), PMF (0.47, 0.48 per 100,000 person-years), and CML (0.72, 1.18 per 100,000 person-years)

**2a**

**2b**

**2c**

**2d**

**Figure 3:** Incidence rate (IR) by age at diagnosis for patients diagnosed between years 2001 and 2021 with (a) ET: essential thrombocythemia, (b) PV: polycythemia vera (c) PMF: primary myelofibrosis, and (d) CML: chronic myeloid leukemia

**Figure 4**: Population pyramids depicting estimated prevalence on Jan 1, 2024 using SEER 8 registries. (a) ET: essential thrombocythemia, (b) PV: polycythemia vera (c) PMF: primary myelofibrosis, and (d) CML: chronic myeloid leukemia

4a

**4b**

**4c**

**4d**

**Figure 5**: Relative Survival (RS) for classical MPNs in the 2001-2016 period, followed to the end of 2021. (a) 5-yr RS for MPNs and other select hematologic malignancies in the United States, (b) 5-yr RS for MPNs assessed by year of diagnosis, (c) 5-yr RS for MPNs assessed by age at diagnosis, (d) RS trend from 1 to 10 yrs since diagnosis of MPNs.

**5a**

5b

**5c**

**5d**

**Figure 6**: Overall survival for MPNs by gender for (a) ET: essential thrombocythemia (b) PV: polycythemia vera (c) PMF: primary myelofibrosis, and (d) CML: chronic myeloid leukemia.

**6a**

0

.25

.5

.75

1

P

r

o

b

a

b

i

l

i

t

y

o

f

S

u

r

v

i

v

a

l

8981

7007

5232

3789

2646

1883

1279

779

441

199

60

Male

14675

11779

9069

6762

4852

3526

2471

1618

934

449

147

Female

Number at risk

0

24

48

72

96

120

144

168

192

216

240

Time (Months)

Female

Male

Essential thrombocythemia (ET)

Overall Median Survival Time: 152 months
[Female:168 months; Male: 131 months]
Log rank test p≤0.001*

**8b**


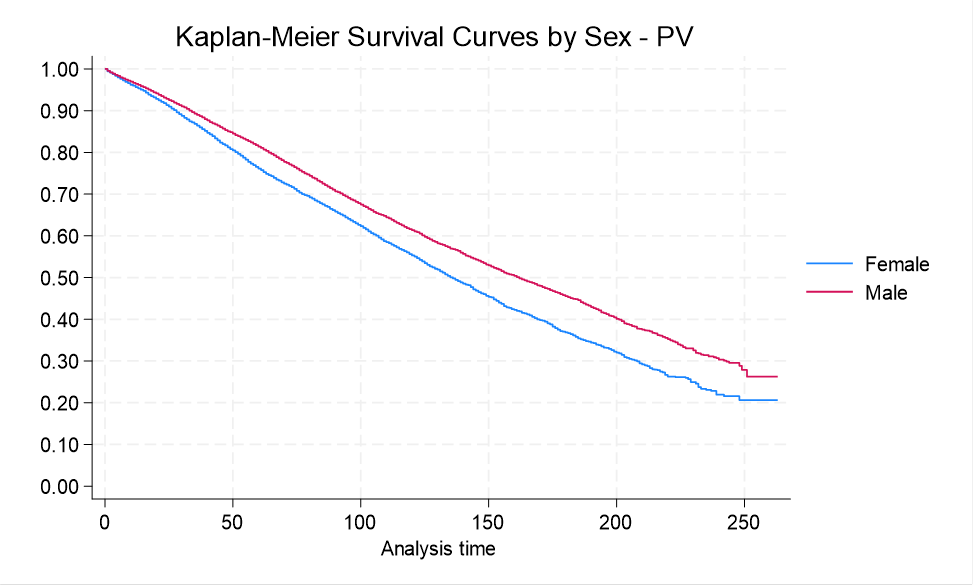


**8c**

**6b**

0

.25

.5

.75

1

P

r

o

b

a

b

i

l

i

t

y

o

f

S

u

r

v

i

v

a

l

12970

10790

8592

6782

5091

3669

2661

1852

1138

541

150

Male

9789

7954

6167

4649

3382

2377

1607

1006

593

259

65

Female

Number at risk

0

24

48

72

96

120

144

168

192

216

240

Time (Months)

Female

Male

Polycythemia vera (PV)

Overall Median Survival Time: 150 months
[Female: 136 months; Male: 162 months]
Log rank test p≤0.001*

**6c**

0

.25

.5

.75

1

P

r

o

b

a

b

i

l

i

t

y

o

f

S

u

r

v

i

v

a

l

3577

2137

1201

711

438

282

176

97

64

30

8

Male

2371

1572

1040

698

439

274

176

109

62

28

12

Female

Number at risk

0

24

48

72

96

120

144

168

192

216

240

Time (Months)

Female

Male

Primary myelofibrosis (PMF)

Overall Median Survival Time: 48 months
[Female:63 months; Male: 42 months]
Log rank test p≤0.001*

Log rank test p≤0.001*

**8d**

**6d**

0

.25

.5

.75

1

P

r

o

b

a

b

i

l

i

t

y

o

f

S

u

r

v

i

v

a

l

5234

3894

2913

2088

1383

873

534

344

196

100

38

Male

4045

3020

2265

1654

1146

730

442

287

182

94

29

Female

Number at risk

0

24

48

72

96

120

144

168

192

216

240

Time (Months)

Female

Male

Chronic myelogenous leukemia (CML)

Overall Median Survival Time: 202 months
[Female:212 months; Male: 197 months]
Log rank test p=0.007*

**Figure 7** – Overall Survival curves for patients living with Myeloproliferative Neoplasms in the United States between 2000-2021(a) ET: essential thrombocythemia (b) PV: polycythemia vera (c) PMF: primary myelofibrosis, and (d) CML: chronic myeloid leukemia.

0

.25

.5

.75

1

P

r

o

b

a

b

i

l

i

t

y

o

f

S

u

r

v

i

v

a

l

0

24

48

72

96

120

144

168

192

216

240

Time (Months)

CML

ET

PV

PMF

Overall Survival by Diagnosis

**Table 1**: Baseline characteristics of patients with myeloproliferative neoplasms (MPNs) diagnosed between years 2001-2021. CML: Chronic myeloid leukemia BCR:ABL positive, ET: essential thrombocythemia, F: women, IQR: inter-quartile range, M: men, PMF: primary myelofibrosis, PV: polycythemia vera,)

| Variable | ET | PV | PMF | CML | Overall |
| --- | --- | --- | --- | --- | --- |
| Total | 24172 (38%) | 23456 (37%) | 6131 (9.7%) | 9483 (15%) | 63242 (100%) |
| Age (median at diagnosis) IQR | 66 (53-76) | 65 (54-75) | 69 (61-77) | 56 (43-68) |  |
| Sex; n (%)  F  M | 4971 (62%)  9201 (38%) | 10118 (43%)  13338 (57%) | 2444 (40%)  3687 (60%) | 4116 (43%)  5367 (57%) | 31649 (50%)  31593 (50%) |
| Year of Diagnosis; n (%)  2000-2005  2006-2010  2011-2016  2017-2021 | 3354 (14%)  5082 (21%)  7790 (32%)  7945 (33%) | 4729 (20%)  5046 (22%)  7302 (31%)  6379 (27%) | 1013 (17%)  1299 (21%)  2011 (33%)  1808 (29%) | 828 (9%)  1339 (14%)  3754 (40%)  3562 (37%) |  |
| Alive  Deceased | 15942 (66%)  8230 (34%) | 14393 (62%)  9063 (38%) | 2209 (36%)  3922 (64%) | 6903 (73%)  2580 (27%) | 39447 (63%)  23795 (37%) |
